# Supplementary material
Source: publisher site journal article supplement (https://www.dovepress.com/article/291391)
Supplement: Supplementary file 1 [file get_supplementary_file.php]

## Supplementary Material. Full technical report of GeneChip Human Transcriptome Array 2.0

Microarray Unit

### Request R1266 Analysis

In the following experiment, the transcriptional expression of two distinct experimental conditions profiled through the use of Affymetrix GeneChip Human Transcriptome Array (HTA) 2.0 was characterized.

The data analysis was carried out using the Partek Genomics Suite commercial software (hereinafter PGS), updated to version 6.6 [6.16.0812 for Mac]

| Status  | Condition             |
|---------|-----------------------|
| treated | R1266_A_(HTA-2_0).CEL |
| control | R1266_B_(HTA-2_0).CEL |

Below are the parameters set in PGS for the import, summarization and normalization of CEL files with RMA algorithm:

Probes to Import: Interrogating Probes and Control Probes

Probe filtering: skip

Algorithm: RMA

Background Correction: RMA Background Correction

Normalization: Quantile Normalization

Log Probes using Base: 2

Probeset Summarization: Median Polish

#### Reference:

Bolstad, B.M., Irizarry R. A., Astrand, M., & Speed, T.P. (2003), A Comparison of Normalization Methods for High Density Oligonucleotide Array Data Based on Bias and Variance. *Bioinformatics* 19(2):185-193

Irizarry, R.A., Bolstad, B.M., Collin, F., Cope, L.M., Hobbs, B., Terence, P., & Speed, T.P. (2003), Summaries of Affymetrix GeneChip probe level data *Nucleic Acids Research* 31(4):e15

Irizarry, R.A., Hobbs, B., Collin, F., Beazer-Barclay, Y.D., Antonellis, K.J., Scherf, U., & Speed, T.P. (2002) Exploration, Normalization, and Summaries of High Density Oligonucleotide Array Probe Level Data.

Wu, Z., Irizarry, R.A., Gentleman, R., Martinez-Murillo, F., & Spencer, F. (2004) A Model-Based Background Adjustment for Oligonucleotide Expression Arrays. *Journal of the American Statistical Association*, 2004 vol. 99 page 909.

## Quality control:

Affymetrix arrays were processed by including in the hybridization mix 4 distinct control oligonucleotides exogenous to the test species that act as hybridization controls. The intensity value of the latter is expected to be homogeneous among the different samples being analyzed. The hybridization controls appear to have a variable expression level within an acceptable range in the different samples tested. (expression values are in log2 scale).

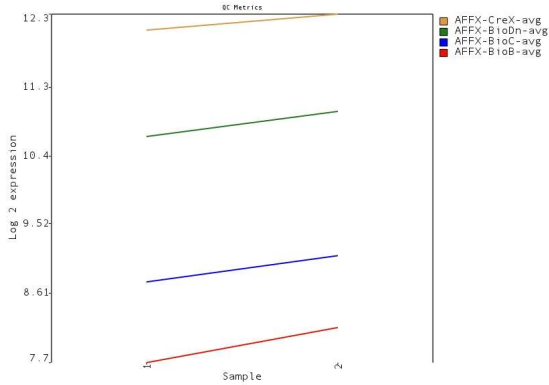

In addition to the hybridization controls, a series of non-related polyadenylated oligonucleotides are used as positive controls, which are amplified together with the biological sample being analyzed and act as (synthesis + hybridization) controls.

A reduced variability in the intensity value of these oligos between the different biological samples tested indicates a low level of bias introduced during the amplification procedure. Even from the synthesis controls, as from the hybridization controls, there is a moderate

variability between the samples being analyzed.

The histogram of distribution of the signal intensity for the different samples tested was then evaluated, from which the image below is obtained.

Following the normalization of the raw data, there are no marked differences between the distribution profiles (also due to the effect of the normalization itself), so we proceeded with the analysis of the 2 experimental points.

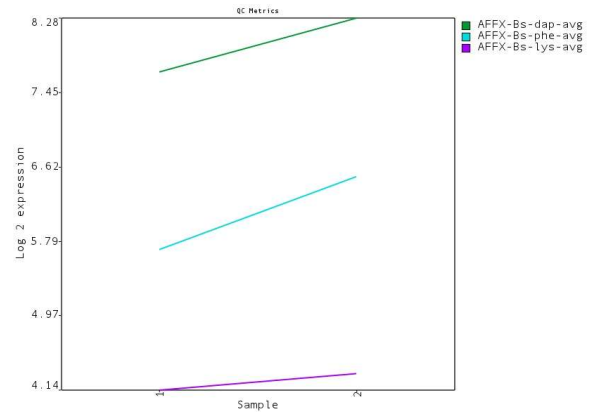

Curva di distribuzione delle intensita' di segnale

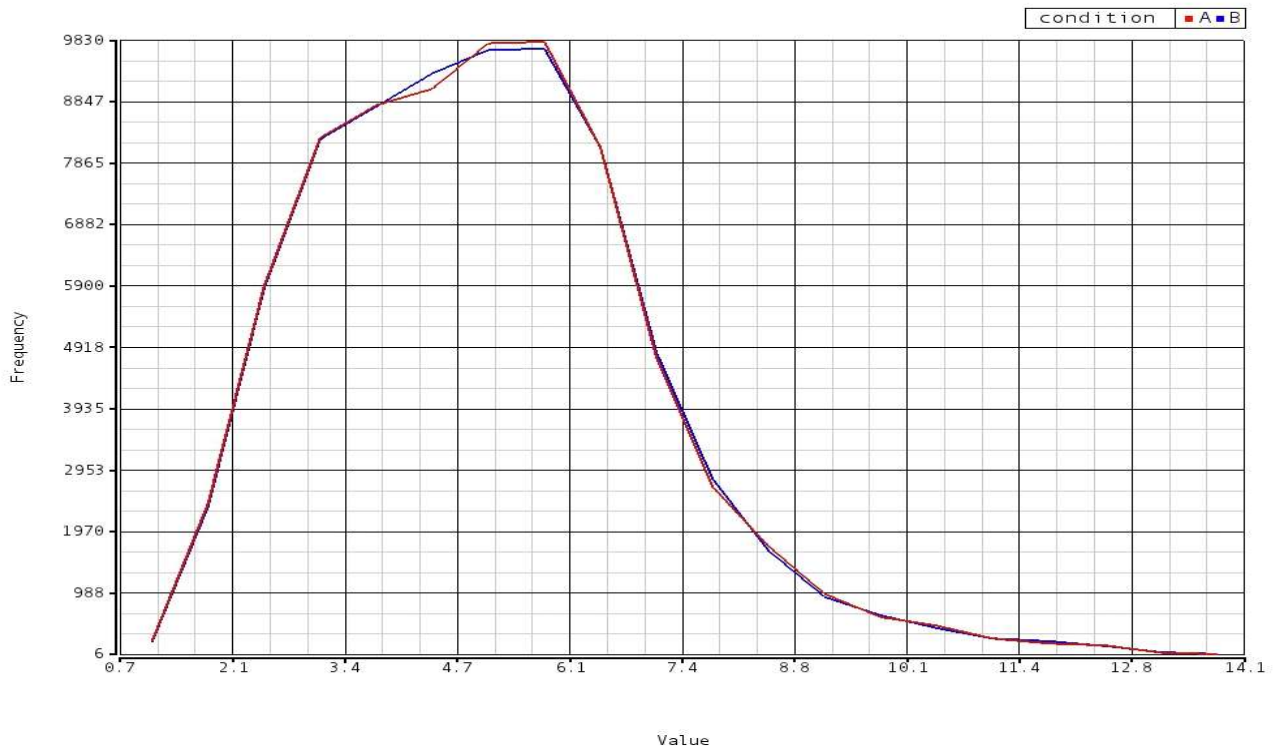

## **PCA visualization (Principal Component Analysis)**

No evaluation was made using PCA as it is not informative on a dataset of only 2 samples.

### **Identification of differentially expressed transcripts:**

The initial list of 925000 probes synthesized on GeneChip array (and deriving from the exon-based analysis of the data) was collapsed to 70500 transcripts and subsequently filtered to eliminate the control probes.

The search for differentially expressed transcripts was conducted on 67500 transcripts belonging to the annotated nucleus with greater accuracy (main)

In the absence of experimental replicates it was not possible to use statistical criteria for the identification of differentially expressed transcripts; a criterion of 'regulation entity' or fold change set to numerical values equal to 2 has been adopted.

Below are the names of the comparative lists generated and the corresponding number of differentially expressed transcripts identified:

A\_vs\_B\_fc2.txt

[163 transcripts identified]

*Note:*

*In the comparison list, the experimental condition B represents the denominator.*

The generated list was annotated using the latest version of the annotations for Affymetrix GeneChip Human Gene ST 2.1 provided by Affymetrix via the NetAffx portal [<https://www.affymetrix.com/analysis/index.affx> ].

## Supplementary data. Full list of transcripts differentially expressed between twin A and B (fc cutoff 2.0, GeneChip HTA 2.0 Affymetrix)

| Column # | Transcript ID   | category | gene_assignment                                                                         | Gene Symbol | RefSeq             | GO_biological_process                                                                                                 | GO_cellular_component                                                                 | GO_molecular_function                                                                 | mrna_assignment                                                                             | pathway | p-value(condition) | p-value(A vs. B) | Ratio(A vs. B) | Fold-Change(A vs. B) | Fold-Change(A vs. B) (Description) | Fold-Change(A vs. B) 95% lower limit | Fold-Change(A vs. B) 95% upper limit | p-value(B vs. A) | Ratio(B vs. A) | Fold-Change(B vs. A) | Fold-Change(B vs. A) (Description) | Fold-Change(B vs. A) 95% lower limit | Fold-Change(B vs. A) 95% upper limit | F(condition) | SS(condition) | SS(Error) | F(Error) |
|----------|-----------------|----------|-----------------------------------------------------------------------------------------|-------------|--------------------|-----------------------------------------------------------------------------------------------------------------------|---------------------------------------------------------------------------------------|---------------------------------------------------------------------------------------|---------------------------------------------------------------------------------------------|---------|--------------------|------------------|----------------|----------------------|------------------------------------|--------------------------------------|--------------------------------------|------------------|----------------|----------------------|------------------------------------|--------------------------------------|--------------------------------------|--------------|---------------|-----------|----------|
| 68045    | TC14002222.hg.1 | main     | OTTHUMT00000326212 // IGHD3-22 // immunoglobulin heavy diversity 3-22 // 14q32.33 // 28 | IGHD3-22    | OTTHUMT00000326212 | ---                                                                                                                   | ---                                                                                   | ---                                                                                   | OTTHUMT00000326212 // Havana transcript // immunoglobulin heavy diversity 3-22 // gene_biot | ---     | ?                  | ?                | 7.64454        | 7.64454              | A up vs B                          | 1                                    | 1                                    | ?                | 0.130812       | -7.64454             | B down vs A                        | 1                                    | 1                                    | ?            | 4.30544       | 0         | 1        |
| 15266    | TC15001009.hg.1 | main     | ---                                                                                     | ---         | ---                | ---                                                                                                                   | ---                                                                                   | ---                                                                                   | DQ592463 // NONCODE // accn=DQ592463 class=piRNA name=piR-59575 ref=NONCODE v2.0 transc     | ---     | ?                  | ?                | 6.44688        | 6.44688              | A up vs B                          | 1                                    | 1                                    | ?                | 0.155114       | -6.44688             | B down vs A                        | 1                                    | 1                                    | ?            | 3.61429       | 0         | 1        |
| 969      | TC01003512.hg.1 | main     | ---                                                                                     | ---         | ---                | ---                                                                                                                   | ---                                                                                   | ---                                                                                   | ENST00000455124 // ENSEMBL // havana:known chromosome:GRCh38:1:171247580:171251794:-1g      | ---     | ?                  | ?                | 5.19802        | 5.19802              | A up vs B                          | 1                                    | 1                                    | ?                | 0.192381       | -5.19802             | B down vs A                        | 1                                    | 1                                    | ?            | 2.82735       | 0         | 1        |
| 25351    | TC01005583.hg.1 | main     | ---                                                                                     | ---         | ---                | ---                                                                                                                   | ---                                                                                   | ---                                                                                   | TCONS_12_0001306 -XLOC_12_000970 // Broad_TUCP // linc-ELTD1-11 chr1:-83485231-8356860      | ---     | ?                  | ?                | 4.22713        | 4.22713              | A up vs B                          | 1                                    | 1                                    | ?                | 0.236567       | -4.22713             | B down vs A                        | 1                                    | 1                                    | ?            | 2.16253       | 0         | 1        |
| 35752    | TC05001631.hg.1 | main     | ---                                                                                     | ---         | ---                | ---                                                                                                                   | ---                                                                                   | ---                                                                                   | DQ597441 // NONCODE // accn=DQ597441 class=piRNA name=piR-35507 ref=NONCODE v2.0 transc     | ---     | ?                  | ?                | 3.71759        | 3.71759              | A up vs B                          | 1                                    | 1                                    | ?                | 0.268992       | -3.71759             | B down vs A                        | 1                                    | 1                                    | ?            | 1.79431       | 0         | 1        |
| 6129     | TC01003722.hg.1 | main     | NM_002023 // FMOD // fibromodulin // 1q32 // 2331 // ENST00000354955 // FMOD // fibrom  | FMOD        | NM_002023          | NM_002023 // GO:0005975 // carboxydrate metabolic process // traceable author statement // traceable author statement | NM_002023 // GO:0005576 // extracellular region // traceable author statement // NM_0 | NM_002023 // GO:0008201 // heparin binding // not recorded // NM_002023 // GO:0048495 | NM_002023 // RefSeq // Homo sapiens fibromodulin (FMOD), transcript variant 1, mRNA. //     | ---     | ?                  | ?                | 3.59352        | 3.59352              | A up vs B                          | 1                                    | 1                                    | ?                | 0.278279       | -3.59352             | B down vs A                        | 1                                    | 1                                    | ?            | 1.70275       | 0         | 1        |
| 19370    | TC0X002032.hg.1 | main     | ---                                                                                     | ---         | ---                | ---                                                                                                                   | ---                                                                                   | ---                                                                                   | OTTHUMT000006060 // NONCODE // novel transcript [gene_bioty pe:lincRNA transcript_bioty     | ---     | ?                  | ?                | 3.53592        | 3.53592              | A up vs B                          | 1                                    | 1                                    | ?                | 0.282812       | -3.53592             | B down vs A                        | 1                                    | 1                                    | ?            | 1.66          | 0         | 1        |
| 31945    | TC15001895.hg.1 | main     | ---                                                                                     | ---         | ---                | ---                                                                                                                   | ---                                                                                   | ---                                                                                   | DQ598152 // NONCODE // accn=DQ598152 class=piRNA name=piR-36218 ref=NONCODE v2.0 transc     | ---     | ?                  | ?                | 3.3752         | 3.3752               | A up vs B                          | 1                                    | 1                                    | ?                | 0.296279       | -3.3752              | B down vs A                        | 1                                    | 1                                    | ?            | 1.53996       | 0         | 1        |
| 62795    | TC06000451.hg.1 | main     | ---                                                                                     | ---         | ---                | ---                                                                                                                   | ---                                                                                   | ---                                                                                   | DQ597264 // NONCODE // accn=DQ597264 class=piRNA name=piR-35330 ref=NONCODE v2.0 transc     | ---     | ?                  | ?                | 3.35544        | 3.35544              | A up vs B                          | 1                                    | 1                                    | ?                | 0.298023       | -3.35544             | B down vs A                        | 1                                    | 1                                    | ?            | 1.52513       | 0         | 1        |
| 26785    | TC14002240.hg.1 | main     | OTTHUMT00000325964 // IGHD3-3 // immunoglobulin heavy diversity 3-3 // 14q32.33 // 2850 | IGHD3-3     | OTTHUMT00000325964 | ---                                                                                                                   | ---                                                                                   | ---                                                                                   | OTTHUMT00000325964 // Havana transcript // immunoglobulin heavy diversity 3-3 // gene_biot  | ---     | ?                  | ?                | 3.34042        | 3.34042              | A up vs B                          | 1                                    | 1                                    | ?                | 0.299363       | -3.34042             | B down vs A                        | 1                                    | 1                                    | ?            | 1.51385       | 0         | 1        |

|       |                 |      |                                                                                          |           |                    |                                                                                       |                                                                                                                                                                                                              |                                                                                          |                                                                                           |                                                  |   |        |         |           |           |   |   |          |          |             |             |   |   |         |         |   |   |
|-------|-----------------|------|------------------------------------------------------------------------------------------|-----------|--------------------|---------------------------------------------------------------------------------------|--------------------------------------------------------------------------------------------------------------------------------------------------------------------------------------------------------------|------------------------------------------------------------------------------------------|-------------------------------------------------------------------------------------------|--------------------------------------------------|---|--------|---------|-----------|-----------|---|---|----------|----------|-------------|-------------|---|---|---------|---------|---|---|
| 5730  | TC15001370.hg.1 | main | ---                                                                                      | ---       | ---                | ---                                                                                   | ---                                                                                                                                                                                                          | ---                                                                                      | DQ595419 // NONCODE // accn=DQ595419 class=piRNA name=piR-61531 ref=NONCODE v2.0 trans    | ---                                              | ? | ?      | 3.30939 | 3.30939   | A up vs B | 1 | 1 | ?        | 0.30217  | - 3.30939   | B down vs A | 1 | 1 | ?       | 1.49051 | 0 | 1 |
| 61360 | TC0X002025.hg.1 | main | S60973 // DMD // dystrophin // Xp21.2 // 1756                                            | DMD       | S60973             | S60973 // GO:0002027 // regulation of heart rate // inferred from mutant phenotype    | S60973 // GO:0005634 // nucleus // inferred from direct assay // S60973 // GO:0005634                                                                                                                        | S60973 // GO:0002162 // dystroglycan binding // inferred from physical interaction       | S60973 // NONCODE // accn=S60973 class=mRNALike lncRNA name=NULL ref=H-invitational v7.   | S60973 // GenMAPP // Striated_muscle_contraction | ? | ?      | 3.29608 | 3.29608   | A up vs B | 1 | 1 | ?        | 0.30339  | - 3.29608   | B down vs A | 1 | 1 | ?       | 1.48049 | 0 | 1 |
| 29380 | TC02004983.hg.1 | main | OTTHUMT00000323143 // IGKV3D-15 // immunoglobulin kappa variable 3D-15 (gene/pseudogene) | IGKV3D-15 | OTTHUMT00000323143 | ---                                                                                   | ---                                                                                                                                                                                                          | ---                                                                                      | OTTHUMT00000323143 // Havana transcript // immunoglobulin kappa variable 3D-15 [gene_bio] | ---                                              | ? | ?      | 3.2704  | 3.2704    | A up vs B | 1 | 1 | ?        | 0.305773 | - 3.2704    | B down vs A | 1 | 1 | ?       | 1.46114 | 0 | 1 |
| 63232 | TC14002256.hg.1 | main | OTTHUMT00000325667 // IGHV3-21 // immunoglobulin heavy variable 3-21 // 14q32.33 // 284  | IGHV3-21  | OTTHUMT00000325667 | ---                                                                                   | ---                                                                                                                                                                                                          | ---                                                                                      | OTTHUMT00000325667 // Havana transcript // immunoglobulin heavy variable 3-21 [gene_biot] | ---                                              | ? | ?      | 3.26475 | 3.26475   | A up vs B | 1 | 1 | ?        | 0.306302 | - 3.26475   | B down vs A | 1 | 1 | ?       | 1.45688 | 0 | 1 |
| 30263 | TC17001827.hg.1 | main | NM_080284 // ABCA6 // ATP binding cassette subfamily A member 6 // 17q24.3 // 23460      | ABCA6     | NM_080284          | NM_080284 // GO:0006869 // lipid transport // not recorded // NM_080284 // GO:0008152 | NM_080284 // GO:0016021 // integral component of membrane // inferred from electronic annotation // NM_080284 // GO:0005524 // ATP binding // inferred from electronic annotation // NM_080284 // GO:0005524 | NM_080284 // RefSeq // Homo sapiens ATP-binding cassette, sub-family A (ABCA1), member 6 | ---                                                                                       | ?                                                | ? | 3.2316 | 3.2316  | A up vs B | 1         | 1 | ? | 0.309445 | - 3.2316 | B down vs A | 1           | 1 | ? | 1.43185 | 0       | 1 |   |
| 10550 | TC04001036.hg.1 | main | NM_052964 // CLNK // cytokine-dependent hematopoietic cell linker // 4p16.1 // 116449    | CLNK      | NM_052964          | NM_052964 // GO:0006955 // immune response // not recorded // NM_052964 // GO:0006955 | NM_052964 // GO:0005622 // intracellular // non-traceable author statement // ENST000                                                                                                                        | NM_052964 // GO:0005070 // SH3/SH2 adaptor activity // non-traceable author statement    | NM_052964 // RefSeq // Homo sapiens cytokine-dependent hematopoietic cell linker (CLNK)   | ---                                              | ? | ?      | 3.21623 | 3.21623   | A up vs B | 1 | 1 | ?        | 0.310923 | - 3.21623   | B down vs A | 1 | 1 | ?       | 1.42024 | 0 | 1 |
| 37792 | TC14000529.hg.1 | main | ---                                                                                      | ---       | ---                | ---                                                                                   | ---                                                                                                                                                                                                          | ---                                                                                      | DQ577549 // NONCODE // accn=DQ577549 class=piRNA name=piR-45661 ref=NONCODE v2.0 trans    | ---                                              | ? | ?      | 3.01918 | 3.01918   | A up vs B | 1 | 1 | ?        | 0.331216 | - 3.01918   | B down vs A | 1 | 1 | ?       | 1.27066 | 0 | 1 |
| 55868 | TC02003403.hg.1 | main | ---                                                                                      | ---       | ---                | ---                                                                                   | ---                                                                                                                                                                                                          | ---                                                                                      | uc010fh.2 // NONCODE // accn=NULL class=lncRNA name=ref=UCSCGeneNoncode transcriptid=     | ---                                              | ? | ?      | 2.9673  | 2.9673    | A up vs B | 1 | 1 | ?        | 0.337006 | - 2.9673    | B down vs A | 1 | 1 | ?       | 1.23112 | 0 | 1 |
| 30781 | TC15000564.hg.1 | main | ---                                                                                      | ---       | ---                | ---                                                                                   | ---                                                                                                                                                                                                          | ---                                                                                      | DQ576734 // NONCODE // accn=DQ576734 class=piRNA name=piR-44846 ref=NONCODE v2.0 trans    | ---                                              | ? | ?      | 2.91286 | 2.91286   | A up vs B | 1 | 1 | ?        | 0.343306 | - 2.91286   | B down vs A | 1 | 1 | ?       | 1.18955 | 0 | 1 |
| 50158 | TC15000894.hg.1 | main | ---                                                                                      | ---       | ---                | ---                                                                                   | ---                                                                                                                                                                                                          | ---                                                                                      | DQ583486 // NONCODE // accn=DQ583486                                                      | ---                                              | ? | ?      | 2.88629 | 2.88629   | A up vs B | 1 | 1 | ?        | 0.346465 | - 2.88629   | B down vs A | 1 | 1 | ?       | 1.16925 | 0 | 1 |



|       |                 |      |                                                                                                          |          |              |                                                                                                               |                                                                                                                   |                                                                                                           |                                                                                                                                      |     |   |         |         |              |              |   |   |              |                  |                   |                   |   |   |              |              |   |   |
|-------|-----------------|------|----------------------------------------------------------------------------------------------------------|----------|--------------|---------------------------------------------------------------------------------------------------------------|-------------------------------------------------------------------------------------------------------------------|-----------------------------------------------------------------------------------------------------------|--------------------------------------------------------------------------------------------------------------------------------------|-----|---|---------|---------|--------------|--------------|---|---|--------------|------------------|-------------------|-------------------|---|---|--------------|--------------|---|---|
| 40507 | TC10002327.hg.1 | main | ---                                                                                                      | ---      | ---          | ---                                                                                                           | ---                                                                                                               | ---                                                                                                       | ref=NONCODE v2.0<br>transc<br>NR_003252 //<br>NONCODE //<br>accn=NR_003252<br>class=lncRNA name=<br>ref=RefGeneNoncode<br>transcript | --- | ? | ?       | 2.54334 | 2.54334      | A up<br>vs B | 1 | 1 | ?            | 0.39318<br>4     | -<br>2.5433<br>4  | B<br>down<br>vs A | 1 | 1 | ?            | 0.9068<br>3  | 0 | 1 |
| 44871 | TC13001561.hg.1 | main | ---                                                                                                      | ---      | ---          | ---                                                                                                           | ---                                                                                                               | ---                                                                                                       | AK129948 //<br>NONCODE //<br>accn=AK129948<br>class=mRNAlike<br>lncRNA<br>name=Human<br>lncRNA ref=Jounra                            | --- | ? | ?       | 2.47651 | 2.47651      | A up<br>vs B | 1 | 1 | ?            | 0.40379<br>4     | -<br>2.4765<br>1  | B<br>down<br>vs A | 1 | 1 | ?            | 0.8558<br>37 | 0 | 1 |
| 33348 | TC15001439.hg.1 | main | ---                                                                                                      | ---      | ---          | ---                                                                                                           | ---                                                                                                               | ---                                                                                                       | DQ585053 //<br>NONCODE //<br>accn=DQ585053<br>class=piRNA<br>name=piR-52165<br>ref=NONCODE v2.0<br>transc                            | --- | ? | ?       | 2.47161 | 2.47161      | A up<br>vs B | 1 | 1 | ?            | 0.40459<br>5     | -<br>2.4716<br>1  | B<br>down<br>vs A | 1 | 1 | ?            | 0.8520<br>99 | 0 | 1 |
| 2822  | TC14001478.hg.1 | main | NM_001098725<br>// TCL1A // T-cell<br>leukemia/lympho<br>ma 1A // 14q32.1<br>// 8115 //<br>NM_021966 /   | TCL1A    | NM_001098725 | NM_001098725<br>//<br>GO:0007275 //<br>endoplasmic<br>reticulum //<br>inferred<br>from<br>electron<br>annotat | NM_001098725<br>//<br>GO:0005515<br>// protein<br>binding //<br>inferred<br>from<br>physical<br>interaction<br>// | NM_001098725<br>//<br>RefSeq // Homo<br>sapiens T-cell<br>leukemia/lymphoma<br>1A (TCL1A), transcript     | ---                                                                                                                                  | ?   | ? | 2.42888 | 2.42888 | A up<br>vs B | 1            | 1 | ? | 0.41171<br>2 | -<br>2.4288<br>8 | B<br>down<br>vs A | 1                 | 1 | ? | 0.8195<br>73 | 0            | 1 |   |
| 26280 | TC08000023.hg.1 | main | NR_039803 //<br>MIR4659A //<br>microRNA 4659a<br>// --- //<br>100616348 //<br>NR_039803 //<br>MIR4659A / | MIR4659A | NR_039803    | ---                                                                                                           | ---                                                                                                               | NR_039803 // RefSeq<br>// Homo sapiens<br>microRNA 4659a<br>(MIR4659A),<br>microRNA. // chr8 //<br>100    | ---                                                                                                                                  | ?   | ? | 2.38628 | 2.38628 | A up<br>vs B | 1            | 1 | ? | 0.41906<br>2 | -<br>2.3862<br>8 | B<br>down<br>vs A | 1                 | 1 | ? | 0.7872<br>16 | 0            | 1 |   |
| 27097 | TC14001418.hg.1 | main | ---                                                                                                      | ---      | ---          | ---                                                                                                           | ---                                                                                                               | DQ582474 //<br>NONCODE //<br>accn=DQ582474<br>class=piRNA<br>name=piR-32586<br>ref=NONCODE v2.0<br>transc | ---                                                                                                                                  | ?   | ? | 2.3535  | 2.3535  | A up<br>vs B | 1            | 1 | ? | 0.4249       | -<br>2.3535      | B<br>down<br>vs A | 1                 | 1 | ? | 0.7623<br>72 | 0            | 1 |   |
| 23291 | TC17001828.hg.1 | main | NR_039750 //<br>MIR4524A //<br>microRNA 4524a<br>// --- //<br>100616316 //<br>NR_039750 //<br>MIR4524A / | MIR4524A | NR_039750    | ---                                                                                                           | ---                                                                                                               | NR_039750 // RefSeq<br>// Homo sapiens<br>microRNA 4524a<br>(MIR4524A),<br>microRNA. // chr17<br>// 10    | ---                                                                                                                                  | ?   | ? | 2.31386 | 2.31386 | A up<br>vs B | 1            | 1 | ? | 0.43217<br>8 | -<br>2.3138<br>6 | B<br>down<br>vs A | 1                 | 1 | ? | 0.7324<br>16 | 0            | 1 |   |
| 17711 | TC17001364.hg.1 | main | ---                                                                                                      | ---      | ---          | ---                                                                                                           | ---                                                                                                               | ENST00000459539 //<br>ENSEMBL //<br>ncrna:snoRNA<br>chromosome:GRCh3<br>7:17:33381407:3338<br>1513:-1 ge  | ---                                                                                                                                  | ?   | ? | 2.28378 | 2.28378 | A up<br>vs B | 1            | 1 | ? | 0.43787<br>1 | -<br>2.2837<br>8 | B<br>down<br>vs A | 1                 | 1 | ? | 0.7097<br>44 | 0            | 1 |   |
| 5830  | TC13000546.hg.1 | main | ---                                                                                                      | ---      | ---          | ---                                                                                                           | ---                                                                                                               | DQ594776 //<br>NONCODE //<br>accn=DQ594776<br>class=piRNA<br>name=piR-60888<br>ref=NONCODE v2.0<br>transc | ---                                                                                                                                  | ?   | ? | 2.28323 | 2.28323 | A up<br>vs B | 1            | 1 | ? | 0.43797<br>7 | -<br>2.2832<br>3 | B<br>down<br>vs A | 1                 | 1 | ? | 0.7093<br>28 | 0            | 1 |   |
| 12792 | TC13000545.hg.1 | main | ---                                                                                                      | ---      | ---          | ---                                                                                                           | ---                                                                                                               | DQ594776 //<br>NONCODE //<br>accn=DQ594776<br>class=piRNA<br>name=piR-60888<br>ref=NONCODE v2.0<br>transc | ---                                                                                                                                  | ?   | ? | 2.28323 | 2.28323 | A up<br>vs B | 1            | 1 | ? | 0.43797<br>7 | -<br>2.2832<br>3 | B<br>down<br>vs A | 1                 | 1 | ? | 0.7093<br>28 | 0            | 1 |   |
| 32799 | TC01000723.hg.1 | main | NM_001083592<br>// ROR1 //<br>receptor tyrosine<br>kinase-like<br>orphan receptor<br>1 // 1p31.3 // 49   | ROR1     | NM_001083592 | NM_001083592<br>//<br>GO:0005737<br>// cytoplasm<br>169 //<br>transmembrane<br>receptor                       | NM_001083592<br>//<br>GO:0004714<br>// transmembrane<br>receptor<br>protein                                       | NM_001083592<br>//<br>RefSeq // Homo<br>sapiens receptor<br>tyrosine kinase-like<br>orphan receptor 1     | NM_001083592<br>//<br>GenMAPP<br>//<br>Nuclear_Receptors<br>//<br>NM_005012 //                                                       | ?   | ? | 2.28128 | 2.28128 | A up<br>vs B | 1            | 1 | ? | 0.43835<br>1 | -<br>2.2812<br>8 | B<br>down<br>vs A | 1                 | 1 | ? | 0.7078<br>62 | 0            | 1 |   |

|       |                 |                  |                                                                                          |           |                 |                                                                                        |                                                                                                           |                                                                                                    |                                                                                         |                           |   |         |         |           |           |   |   |          |           |             |             |   |   |          |          |   |   |
|-------|-----------------|------------------|------------------------------------------------------------------------------------------|-----------|-----------------|----------------------------------------------------------------------------------------|-----------------------------------------------------------------------------------------------------------|----------------------------------------------------------------------------------------------------|-----------------------------------------------------------------------------------------|---------------------------|---|---------|---------|-----------|-----------|---|---|----------|-----------|-------------|-------------|---|---|----------|----------|---|---|
|       |                 |                  |                                                                                          |           |                 | protein tyrosine kinase signaling                                                      | NM_001083592                                                                                              | tyrosine kinase activity /                                                                         |                                                                                         | GenMAPP // Nuclear_Recept |   |         |         |           |           |   |   |          |           |             |             |   |   |          |          |   |   |
| 30734 | TC10000255.hg.1 | m<br>a<br>i<br>n | ---                                                                                      |           | ---             | ---                                                                                    | ---                                                                                                       | ---                                                                                                | ENST00000450980 // ENSEMBL // havana:known chromosome:GRCh38:10:38247922:38333155:1 gen | ---                       | ? | ?       | 2.26866 | 2.26866   | A up vs B | 1 | 1 | ?        | 0.440789  | - 2.26866   | B down vs A | 1 | 1 | ?        | 0.698373 | 0 | 1 |
| 61497 | TC09001248.hg.1 | m<br>a<br>i<br>n | ---                                                                                      |           | ---             | ---                                                                                    | ---                                                                                                       | ---                                                                                                | DQ574826 // NONCODE // accn=DQ574826 class=piRNA name=piR-42938 ref=NONCODE v2.0 transc | ---                       | ? | ?       | 2.26738 | 2.26738   | A up vs B | 1 | 1 | ?        | 0.441037  | - 2.26738   | B down vs A | 1 | 1 | ?        | 0.697413 | 0 | 1 |
| 47190 | TC12000130.hg.1 | m<br>a<br>i<br>n | NM_080387 // CLEC4D // C-type lectin domain family 4, member D // 12p13.31 // 338339 //  | CLEC4D    | NM_080387       | NM_080387 // GO:000223 // stimulatory C-type lectin receptor signaling pathway // trac | NM_080387 // GO:0030246 // plasma membrane // carbohydrate binding // inferred from electronic annotation | NM_080387 // RefSeq // Homo sapiens C-type lectin domain family 4, member D (CLEC4D), m            | ---                                                                                     | ?                         | ? | 2.24474 | 2.24474 | A up vs B | 1         | 1 | ? | 0.445486 | - 2.24474 | B down vs A | 1           | 1 | ? | 0.680418 | 0        | 1 |   |
| 44915 | TC19002491.hg.1 | m<br>a<br>i<br>n | M76743 // CEACAM1 // carcinoembryonic antigen-related cell adhesion molecule 1 (biliary) | CECAM1    | M76743          | M76743 // GO:0005886 // plasma membrane // traceable author statement // M76743 // G   | M76743 // GO:0005515 // protein binding // inferred from physical interaction // M767                     | M76743 // NONCODE // RefSeq // Homo sapiens class=mRNALike lncRNA name=NULL ref=H-invitational v7. | ---                                                                                     | ?                         | ? | 2.24454 | 2.24454 | A up vs B | 1         | 1 | ? | 0.445526 | - 2.24454 | B down vs A | 1           | 1 | ? | 0.680266 | 0        | 1 |   |
| 8621  | TC03001082.hg.1 | m<br>a<br>i<br>n | ENST00000426468 // XYLT1-AS2 // XYLT1 antisense RNA 2 // 3q29 // 101410543 // ENST00     | XYLT1-AS2 | ENST00000426468 | ---                                                                                    | ---                                                                                                       | ENST00000426468 // ENSEMBL // XYLT1 antisense RNA 2 [gene_biotype:antisense transcript             | ---                                                                                     | ?                         | ? | 2.24415 | 2.24415 | A up vs B | 1         | 1 | ? | 0.445603 | - 2.24415 | B down vs A | 1           | 1 | ? | 0.679975 | 0        | 1 |   |
| 23647 | TC02004396.hg.1 | m<br>a<br>i<br>n | X93757 // IGKC // immunoglobulin kappa constant // 2p12 // 3514                          | IGKC      | X93757          | X93757 // GO:0001895 // retina homeostasis // inferred from expression pattern // X93  | X93757 // GO:0005576 // extracellular region // non-traceable author statement // X93                     | X93757 // NONCODE // RefSeq // Homo sapiens lncRNA name=NULL ref=H-invitational v7.                | ---                                                                                     | ?                         | ? | 2.23131 | 2.23131 | A up vs B | 1         | 1 | ? | 0.448168 | - 2.23131 | B down vs A | 1           | 1 | ? | 0.670353 | 0        | 1 |   |
| 19705 | TC01000371.hg.1 | m<br>a<br>i<br>n | NR_002997 // SCARN1 // small Cajal body-specific RNA 1 // 1p35.3 // 677774 // ENST000    | SCARN1    | NR_002997       | ---                                                                                    | ---                                                                                                       | NR_002997 // RefSeq // Homo sapiens small Cajal body-specific RNA 1 (SCARN1), guide RN             | ---                                                                                     | ?                         | ? | 2.2179  | 2.2179  | A up vs B | 1         | 1 | ? | 0.450877 | - 2.2179  | B down vs A | 1           | 1 | ? | 0.660325 | 0        | 1 |   |
| 628   | TC02000684.hg.1 | m<br>a<br>i<br>n | ---                                                                                      |           | ---             | ---                                                                                    | ---                                                                                                       | DQ574014 // NONCODE // accn=DQ574014 class=piRNA name=piR-42126 ref=NONCODE v2.0 transc            | ---                                                                                     | ?                         | ? | 2.19319 | 2.19319 | A up vs B | 1         | 1 | ? | 0.455958 | - 2.19319 | B down vs A | 1           | 1 | ? | 0.641876 | 0        | 1 |   |
| 27643 | TC02002199.hg.1 | m<br>a<br>i<br>n | ---                                                                                      |           | ---             | ---                                                                                    | ---                                                                                                       | DQ587734 // NONCODE // accn=DQ587734 class=piRNA name=piR-54846 ref=NONCODE v2.0 transc            | ---                                                                                     | ?                         | ? | 2.19319 | 2.19319 | A up vs B | 1         | 1 | ? | 0.455958 | - 2.19319 | B down vs A | 1           | 1 | ? | 0.641876 | 0        | 1 |   |



|       |                 |      |                                                                                          |       |           |                                                                                                     |                                                                                                     |                                                                                         |                                                                                          |                                                                                        |   |   |         |         |           |   |   |   |          |          |             |   |   |   |          |   |   |
|-------|-----------------|------|------------------------------------------------------------------------------------------|-------|-----------|-----------------------------------------------------------------------------------------------------|-----------------------------------------------------------------------------------------------------|-----------------------------------------------------------------------------------------|------------------------------------------------------------------------------------------|----------------------------------------------------------------------------------------|---|---|---------|---------|-----------|---|---|---|----------|----------|-------------|---|---|---|----------|---|---|
| 18654 | TC11002231.hg.1 | main | NM_002424 // MMP8 // matrix metalloproteinase 8 // 11q22.3 // 4317 // ENST0000023682 6 / | MMP8  | NM_002424 | NM_002424 // GO:0006508 // proteolysis // inferred from direct assay // NM_002424 //                | NM_002424 // GO:0005576 // extracellular region // traceable author statement // NM_0               | NM_002424 // GO:0004222 // metalloendopeptidase activity // inferred from electronic    | NM_002424 // RefSeq // Homo sapiens matrix metalloproteinase 8 (MMP8), transcript varian | NM_002424 // GenMAPP // Matrix_Metalloproteinases // ENST00000236826 // GenMAPP // Mat | ? | ? | 2.18205 | 2.18205 | A up vs B | 1 | 1 | ? | 0.458285 | -2.18205 | B down vs A | 1 | 1 | ? | 0.633582 | 0 | 1 |
| 30061 | TC15000553.hg.1 | main | ---                                                                                      | ---   | ---       | ---                                                                                                 | ---                                                                                                 | ---                                                                                     | DQ583824 // NONCODE // accn=DQ583824 class=piRNA name=piR-50936 ref=NONCODE v2.0 trans   | ---                                                                                    | ? | ? | 2.18179 | 2.18179 | A up vs B | 1 | 1 | ? | 0.45834  | -2.18179 | B down vs A | 1 | 1 | ? | 0.633387 | 0 | 1 |
| 67166 | TC04001038.hg.1 | main | ---                                                                                      | ---   | ---       | ---                                                                                                 | ---                                                                                                 | ---                                                                                     | ENST00000410250 // ENSEMBL // RNA, 5S ribosomal pseudogene 156 [gene_biotype:rRNA trans  | ---                                                                                    | ? | ? | 2.1683  | 2.1683  | A up vs B | 1 | 1 | ? | 0.46119  | -2.1683  | B down vs A | 1 | 1 | ? | 0.623362 | 0 | 1 |
| 16571 | TC06003963.hg.1 | main | ---                                                                                      | ---   | ---       | ---                                                                                                 | ---                                                                                                 | ---                                                                                     | TCONS_00011605 // NONCODE // accn=NULL class=lncRNA name=Human lincRNA ref=BodyMapLinc   | ---                                                                                    | ? | ? | 2.16004 | 2.16004 | A up vs B | 1 | 1 | ? | 0.462955 | -2.16004 | B down vs A | 1 | 1 | ? | 0.617222 | 0 | 1 |
| 37068 | TC15001139.hg.1 | main | ---                                                                                      | ---   | ---       | ---                                                                                                 | ---                                                                                                 | ---                                                                                     | DQ575741 // NONCODE // accn=DQ575741 class=piRNA name=piR-43853 ref=NONCODE v2.0 trans   | ---                                                                                    | ? | ? | 2.15186 | 2.15186 | A up vs B | 1 | 1 | ? | 0.464714 | -2.15186 | B down vs A | 1 | 1 | ? | 0.611158 | 0 | 1 |
| 39233 | TC15001173.hg.1 | main | ---                                                                                      | ---   | ---       | ---                                                                                                 | ---                                                                                                 | ---                                                                                     | DQ575741 // NONCODE // accn=DQ575741 class=piRNA name=piR-43853 ref=NONCODE v2.0 trans   | ---                                                                                    | ? | ? | 2.15186 | 2.15186 | A up vs B | 1 | 1 | ? | 0.464714 | -2.15186 | B down vs A | 1 | 1 | ? | 0.611158 | 0 | 1 |
| 44194 | TC15000185.hg.1 | main | ---                                                                                      | ---   | ---       | ---                                                                                                 | ---                                                                                                 | ---                                                                                     | DQ575741 // NONCODE // accn=DQ575741 class=piRNA name=piR-43853 ref=NONCODE v2.0 trans   | ---                                                                                    | ? | ? | 2.15186 | 2.15186 | A up vs B | 1 | 1 | ? | 0.464714 | -2.15186 | B down vs A | 1 | 1 | ? | 0.611158 | 0 | 1 |
| 53793 | TC15000960.hg.1 | main | ---                                                                                      | ---   | ---       | ---                                                                                                 | ---                                                                                                 | ---                                                                                     | DQ575741 // NONCODE // accn=DQ575741 class=piRNA name=piR-43853 ref=NONCODE v2.0 trans   | ---                                                                                    | ? | ? | 2.15186 | 2.15186 | A up vs B | 1 | 1 | ? | 0.464714 | -2.15186 | B down vs A | 1 | 1 | ? | 0.611158 | 0 | 1 |
| 63796 | TC15000159.hg.1 | main | ---                                                                                      | ---   | ---       | ---                                                                                                 | ---                                                                                                 | ---                                                                                     | DQ575741 // NONCODE // accn=DQ575741 class=piRNA name=piR-43853 ref=NONCODE v2.0 trans   | ---                                                                                    | ? | ? | 2.15186 | 2.15186 | A up vs B | 1 | 1 | ? | 0.464714 | -2.15186 | B down vs A | 1 | 1 | ? | 0.611158 | 0 | 1 |
| 40827 | TC04002263.hg.1 | main | NR_036614 // DCLK2 // doublecortin-like kinase 2 // 4q31.3 // 166614                     | DCLK2 | NR_036614 | NR_036614 // GO:0006468 // protein phosphorylation // inferred from electronic annotation // NR_036 | NR_036614 // GO:0005737 // cytoplasmic protein serine/threonine kinase activity // inferred from el | NR_036614 // GO:0004674 // protein serine/threonine kinase activity // inferred from el | NR_036614 // NONCODE // accn=NR_036614 class=lncRNA name=ref=RefGeneNoncode transcript   | ---                                                                                    | ? | ? | 2.15173 | 2.15173 | A up vs B | 1 | 1 | ? | 0.464742 | -2.15173 | B down vs A | 1 | 1 | ? | 0.611064 | 0 | 1 |
| 57940 | TC15002079.hg.1 | main | ---                                                                                      | ---   | ---       | ---                                                                                                 | ---                                                                                                 | ---                                                                                     | TCONS_00023303 // NONCODE // accn=NULL                                                   | ---                                                                                    | ? | ? | 2.14877 | 2.14877 | A up vs B | 1 | 1 | ? | 0.465382 | -2.14877 | B down vs A | 1 | 1 | ? | 0.608869 | 0 | 1 |

|       |                 |      |                                                                                           |         |                 |                                                                                         |                                                                                        |                                                                                           |     |                                                                                                                                                                       |     |         |         |              |         |              |   |              |              |                   |              |                   |   |              |   |              |   |   |
|-------|-----------------|------|-------------------------------------------------------------------------------------------|---------|-----------------|-----------------------------------------------------------------------------------------|----------------------------------------------------------------------------------------|-------------------------------------------------------------------------------------------|-----|-----------------------------------------------------------------------------------------------------------------------------------------------------------------------|-----|---------|---------|--------------|---------|--------------|---|--------------|--------------|-------------------|--------------|-------------------|---|--------------|---|--------------|---|---|
| 14227 | TC12000046.hg.1 | main | ---                                                                                       | ---     | ---             | ---                                                                                     | ---                                                                                    | ---                                                                                       | --- | class=lncRNA<br>name=Human<br>lincRNA<br>ref=BodyMapLinc<br>DQ584103 //<br>NONCODE //<br>accn=DQ584103<br>class=piRNA<br>name=piR-51215<br>ref=NONCODE v2.0<br>transc | --- | ?       | ?       | 2.14861      | 2.14861 | A up<br>vs B | 1 | 1            | ?            | 0.46541<br>8      | -<br>2.14861 | B<br>down<br>vs A | 1 | 1            | ? | 0.6087<br>47 | 0 | 1 |
| 3087  | TC10000869.hg.1 | main | NM_001243194 // INPP5F // inositol polyphosphate-5-phosphatase F // 10q26.11 // 22876 /   | INPP5F  | NM_001243194    | NM_001243194 // GO:0005622                                                              | NM_001243194 // GO:0042578                                                             | NM_001243194 // RefSeq // Homo sapiens inositol polyphosphate-5-phosphatase F (INPP5F),   | --- | ?                                                                                                                                                                     | ?   | 2.14222 | 2.14222 | A up<br>vs B | 1       | 1            | ? | 0.46680<br>6 | -<br>2.14222 | B<br>down<br>vs A | 1            | 1                 | ? | 0.6040<br>16 | 0 | 1            |   |   |
| 41736 | TC0X002051.hg.1 | main | ---                                                                                       | ---     | ---             | ---                                                                                     | ---                                                                                    | TCONS_00017504 // NONCODE // accn=NULL class=lncRNA name=Human lincRNA ref=BodyMapLinc    | --- | ?                                                                                                                                                                     | ?   | 2.12833 | 2.12833 | A up<br>vs B | 1       | 1            | ? | 0.46985<br>1 | -<br>2.12833 | B<br>down<br>vs A | 1            | 1                 | ? | 0.5937<br>49 | 0 | 1            |   |   |
| 42674 | TC13001040.hg.1 | main | ---                                                                                       | ---     | ---             | ---                                                                                     | ---                                                                                    | TCONS_00021766 // NONCODE // accn=NULL class=lncRNA name=Human lincRNA ref=BodyMapLinc    | --- | ?                                                                                                                                                                     | ?   | 2.11469 | 2.11469 | A up<br>vs B | 1       | 1            | ? | 0.47288<br>2 | -<br>2.11469 | B<br>down<br>vs A | 1            | 1                 | ? | 0.5836<br>84 | 0 | 1            |   |   |
| 65925 | TC04001138.hg.1 | main | NR_039966 // MIR4802 // microRNA 4802 // --- // 100616274 // NR_039966 // MIR4802 // m    | MIR4802 | NR_039966       | ---                                                                                     | ---                                                                                    | NR_039966 // RefSeq // Homo sapiens microRNA 4802 (MIR4802), microRNA. // chr4 // 100 /   | --- | ?                                                                                                                                                                     | ?   | 2.11219 | 2.11219 | A up<br>vs B | 1       | 1            | ? | 0.47344<br>1 | -<br>2.11219 | B<br>down<br>vs A | 1            | 1                 | ? | 0.5818<br>42 | 0 | 1            |   |   |
| 59811 | TC03003258.hg.1 | main | ---                                                                                       | ---     | ---             | ---                                                                                     | ---                                                                                    | TCONS_00006729 // NONCODE // accn=NULL class=lncRNA name=Human lincRNA ref=BodyMapLinc    | --- | ?                                                                                                                                                                     | ?   | 2.10889 | 2.10889 | A up<br>vs B | 1       | 1            | ? | 0.47418<br>3 | -<br>2.10889 | B<br>down<br>vs A | 1            | 1                 | ? | 0.5794<br>1  | 0 | 1            |   |   |
| 12409 | TC0X002033.hg.1 | main | ---                                                                                       | ---     | ---             | ---                                                                                     | ---                                                                                    | OTTHUMT00000060661 // NONCODE // novel transcript [gene_bioty pe:lincRNA transcript_bioty | --- | ?                                                                                                                                                                     | ?   | 2.09321 | 2.09321 | A up<br>vs B | 1       | 1            | ? | 0.47773<br>5 | -<br>2.09321 | B<br>down<br>vs A | 1            | 1                 | ? | 0.5678<br>75 | 0 | 1            |   |   |
| 24179 | TC16001441.hg.1 | main | ENST00000050174 0 // ACSM3 // acyl-CoA synthetase medium-chain family member 3 // 16p13.1 | ACSM3   | ENST00000050174 | ENST00000050174 // GO:0005759 // mitochondrial matrix // inferred from electronic annot | ENST00000050174 // GO:0005524 // ATP binding // inferred from electronic annotation // | ENST00000050174 // NONCODE // acyl-CoA synthetase medium-chain family member 3 [gene_bi   | --- | ?                                                                                                                                                                     | ?   | 2.08237 | 2.08237 | A up<br>vs B | 1       | 1            | ? | 0.48022<br>1 | -<br>2.08237 | B<br>down<br>vs A | 1            | 1                 | ? | 0.5599<br>24 | 0 | 1            |   |   |
| 49283 | TC02004724.hg.1 | main | EF212156 // TTN // titin // 2q31 // 7273                                                  | TTN     | EF212156        | EF212156 // GO:0000794 // condensed nuclear chromosome // inferred from direct assay /  | EF212156 // GO:0002020 // protease binding // inferred from physical interaction // E  | EF212156 // NONCODE // accn=EF212156 class=mRNAlike lincRNA name=NULL ref=H-Invitational  | --- | ?                                                                                                                                                                     | ?   | 2.06809 | 2.06809 | A up<br>vs B | 1       | 1            | ? | 0.48353<br>9 | -<br>2.06809 | B<br>down<br>vs A | 1            | 1                 | ? | 0.5494<br>62 | 0 | 1            |   |   |
| 47526 | TC10002326.hg.1 | main | ---                                                                                       | ---     | ---             | ---                                                                                     | ---                                                                                    | NR_003251 // NONCODE // accn=NR_003251                                                    | --- | ?                                                                                                                                                                     | ?   | 2.06142 | 2.06142 | A up<br>vs B | 1       | 1            | ? | 0.48510<br>2 | -<br>2.06142 | B<br>down<br>vs A | 1            | 1                 | ? | 0.5445<br>91 | 0 | 1            |   |   |

|       |                 |      |                                                                                                     |              |           |                                                                                                    |                                                                                                    |                                                                           |                                                                                                              |                                                                                                              |     |   |         |         |           |           |   |   |          |          |             |             |   |   |          |          |   |   |
|-------|-----------------|------|-----------------------------------------------------------------------------------------------------|--------------|-----------|----------------------------------------------------------------------------------------------------|----------------------------------------------------------------------------------------------------|---------------------------------------------------------------------------|--------------------------------------------------------------------------------------------------------------|--------------------------------------------------------------------------------------------------------------|-----|---|---------|---------|-----------|-----------|---|---|----------|----------|-------------|-------------|---|---|----------|----------|---|---|
|       |                 | in   |                                                                                                     |              |           |                                                                                                    |                                                                                                    |                                                                           |                                                                                                              | class=lincRNA name=ref=RefGeneNoncode transcript                                                             |     |   |         |         |           |           |   |   |          |          |             |             |   |   |          |          |   |   |
| 26580 | TC09002817.hg.1 | main | ---                                                                                                 |              | ---       | ---                                                                                                | ---                                                                                                | ---                                                                       |                                                                                                              | linc_luo_610 //<br>NONCODE //<br>accn=NULL<br>class=lincRNA<br>name=Human<br>lincRNA ref=Scripture<br>Rec    | --- | ? | ?       | 2.05892 | 2.05892   | A up vs B | 1 | 1 | ?        | 0.485691 | -2.05892    | B down vs A | 1 | 1 | ?        | 0.542768 | 0 | 1 |
| 48187 | TC04001928.hg.1 | main | ---                                                                                                 |              | ---       | ---                                                                                                | ---                                                                                                | ---                                                                       |                                                                                                              | TCONS_0008002 //<br>NONCODE //<br>accn=NULL<br>class=lincRNA<br>name=Human<br>lincRNA<br>ref=BodyMapLinc     | --- | ? | ?       | 2.05608 | 2.05608   | A up vs B | 1 | 1 | ?        | 0.486362 | -2.05608    | B down vs A | 1 | 1 | ?        | 0.540693 | 0 | 1 |
| 52461 | TC15000084.hg.1 | main | NR_003303 //<br>SNORD115-11 //<br>small nucleolar RNA, C/D box 115-11 //<br>15q11.2 //<br>100033448 | SNORD 115-11 | NR_003303 | ---                                                                                                | ---                                                                                                | ---                                                                       |                                                                                                              | NR_003303 // RefSeq // Homo sapiens small nucleolar RNA, C/D box 115-11 (SNORD115-11),                       | --- | ? | ?       | 2.05186 | 2.05186   | A up vs B | 1 | 1 | ?        | 0.487364 | -2.05186    | B down vs A | 1 | 1 | ?        | 0.537611 | 0 | 1 |
| 11275 | TC15000112.hg.1 | main | NR_003344 //<br>SNORD115-29 //<br>small nucleolar RNA, C/D box 115-29 //<br>15q11.2 //<br>100033803 | SNORD 115-29 | NR_003344 | ---                                                                                                | ---                                                                                                | ---                                                                       |                                                                                                              | NR_003344 // RefSeq // Homo sapiens small nucleolar RNA, C/D box 115-29 (SNORD115-29),                       | --- | ? | ?       | 2.05186 | 2.05186   | A up vs B | 1 | 1 | ?        | 0.487364 | -2.05186    | B down vs A | 1 | 1 | ?        | 0.537611 | 0 | 1 |
| 25208 | TC15000099.hg.1 | main | NR_003358 //<br>SNORD115-43 //<br>small nucleolar RNA, C/D box 115-43 //<br>15q11.2 //<br>100033817 | SNORD 115-43 | NR_003358 | ---                                                                                                | ---                                                                                                | ---                                                                       |                                                                                                              | NR_003358 // RefSeq // Homo sapiens small nucleolar RNA, C/D box 115-43 (SNORD115-43),                       | --- | ? | ?       | 2.05186 | 2.05186   | A up vs B | 1 | 1 | ?        | 0.487364 | -2.05186    | B down vs A | 1 | 1 | ?        | 0.537611 | 0 | 1 |
| 53196 | TC15000105.hg.1 | main | NR_003358 //<br>SNORD115-43 //<br>small nucleolar RNA, C/D box 115-43 //<br>15q11.2 //<br>100033817 | SNORD 115-43 | NR_003358 | ---                                                                                                | ---                                                                                                | ---                                                                       |                                                                                                              | NR_003358 // RefSeq // Homo sapiens small nucleolar RNA, C/D box 115-43 (SNORD115-43),                       | --- | ? | ?       | 2.05186 | 2.05186   | A up vs B | 1 | 1 | ?        | 0.487364 | -2.05186    | B down vs A | 1 | 1 | ?        | 0.537611 | 0 | 1 |
| 47383 | TC03002827.hg.1 | main | ---                                                                                                 |              | ---       | ---                                                                                                | ---                                                                                                | ---                                                                       |                                                                                                              | AK098488 //<br>NONCODE //<br>accn=AK098488<br>class=miRNAlike<br>lincRNA<br>name=Human<br>lincRNA ref=Jounra | --- | ? | ?       | 2.05079 | 2.05079   | A up vs B | 1 | 1 | ?        | 0.487617 | -2.05079    | B down vs A | 1 | 1 | ?        | 0.536835 | 0 | 1 |
| 19979 | TC07001921.hg.1 | main | ---                                                                                                 |              | ---       | ---                                                                                                | ---                                                                                                | ---                                                                       |                                                                                                              | ENST0000459596 //<br>ENSEMBL //<br>ncrna:snRNA<br>chromosome:GRCh3<br>7:7:140075363:140075466:-1g            | --- | ? | ?       | 2.04512 | 2.04512   | A up vs B | 1 | 1 | ?        | 0.488969 | -2.04512    | B down vs A | 1 | 1 | ?        | 0.532702 | 0 | 1 |
| 4030  | TC19000134.hg.1 | main | NM_174918 //<br>MCEMP1 // mast cell-expressed membrane protein 1 //<br>19p13.2 //<br>199675 ///     | MCEMP1       | NM_174918 | ---                                                                                                | NM_174918 //<br>GO:0016021 // integral component of membrane //<br>inferred from electronic a      | ---                                                                       |                                                                                                              | NM_174918 // RefSeq // Homo sapiens mast cell-expressed membrane protein 1 (MCEMP1), mRNA                    | --- | ? | ?       | 2.03345 | 2.03345   | A up vs B | 1 | 1 | ?        | 0.491776 | -2.03345    | B down vs A | 1 | 1 | ?        | 0.524212 | 0 | 1 |
| 31458 | TC07002696.hg.1 | main | ---                                                                                                 |              | ---       | ---                                                                                                | ---                                                                                                | ---                                                                       |                                                                                                              | TCONS_00013649 //<br>NONCODE //<br>accn=NULL<br>class=lincRNA<br>name=Human<br>lincRNA<br>ref=BodyMapLinc    | --- | ? | ?       | 2.0301  | 2.0301    | A up vs B | 1 | 1 | ?        | 0.492587 | -2.0301     | B down vs A | 1 | 1 | ?        | 0.52178  | 0 | 1 |
| 35656 | TC01004449.hg.1 | main | AK000776 //<br>ROR1 // receptor tyrosine kinase-like orphan receptor 1 //<br>1p31.3 // 4919         | ROR1         | AK000776  | AK000776 //<br>GO:0005737 // cytoplasm //<br>GO:0007169 // transmembrane receptor protein tyrosine | AK000776 //<br>GO:0005737 // cytoplasm //<br>GO:0007169 // transmembrane receptor protein tyrosine | AK000776 //<br>GO:0004714 // traceable membrane receptor protein tyrosine | AK000776 //<br>NONCODE //<br>accn=AK000776<br>class=miRNAlike<br>lincRNA<br>name=Human<br>lincRNA ref=Jounra | AK000776 //<br>GenMAPP //<br>Nuclear_Receptors                                                               | ?   | ? | 2.02947 | 2.02947 | A up vs B | 1         | 1 | ? | 0.492739 | -2.02947 | B down vs A | 1           | 1 | ? | 0.521326 | 0        | 1 |   |



|       |                 |                  |                                                                                                             |               |                                |                                                                                                                                           |                                                                                                                         |                                                                                                    |                                                                                                                                         |     |   |   |          |          |                   |   |   |   |         |         |              |   |   |   |          |   |   |
|-------|-----------------|------------------|-------------------------------------------------------------------------------------------------------------|---------------|--------------------------------|-------------------------------------------------------------------------------------------------------------------------------------------|-------------------------------------------------------------------------------------------------------------------------|----------------------------------------------------------------------------------------------------|-----------------------------------------------------------------------------------------------------------------------------------------|-----|---|---|----------|----------|-------------------|---|---|---|---------|---------|--------------|---|---|---|----------|---|---|
| 41268 | TC06001641.hg.1 | m<br>a<br>i<br>n | ---                                                                                                         | ---           | ---                            | ---                                                                                                                                       | ---                                                                                                                     | ---                                                                                                | ref=NONCODE v2.0<br>transc<br>DQ587590 //<br>NONCODE //<br>accn=DQ587590<br>class=piRNA<br>name=piR-54702<br>ref=NONCODE v2.0<br>transc | --- | ? | ? | 0.488742 | -2.04607 | A<br>down<br>vs B | 1 | 1 | ? | 2.04607 | 2.04607 | B up<br>vs A | 1 | 1 | ? | 0.533395 | 0 | 1 |
| 47809 | TC09001017.hg.1 | m<br>a<br>i<br>n | ---                                                                                                         | ---           | ---                            | ---                                                                                                                                       | ---                                                                                                                     | ---                                                                                                | uc022bfp.1 // UCSC<br>Genes // Annexin II<br>and uses thereof. //<br>chr9 // 100 // 100 //<br>0 //                                      | --- | ? | ? | 0.487186 | -2.0526  | A<br>down<br>vs B | 1 | 1 | ? | 2.0526  | 2.0526  | B up<br>vs A | 1 | 1 | ? | 0.538157 | 0 | 1 |
| 844   | TC02004976.hg.1 | m<br>a<br>i<br>n | OTTHUMT000003<br>23274 // IGV1D-<br>33 //<br>immunoglobulin<br>kappa variable<br>1D-33 // 2p12 //<br>28896  | IGKV1D<br>-33 | OTTHU<br>MT0000<br>032327<br>4 | OTTHUM<br>T000003<br>23274 //<br>GO:0006<br>898 //<br>receptor<br>-<br>mediate<br>d<br>endocyt<br>osis //<br>traceabl<br>e<br>author<br>s | OTTHUMT00<br>000323274<br>//<br>GO:0005576<br>//<br>extracellular<br>region //<br>non-<br>traceable<br>author<br>statem | OTTHUMT0<br>000323274<br>//<br>GO:0003823<br>//<br>antigen<br>binding //<br>1D-<br>33[<br>gene_bio | OTTHUMT000003232<br>74 // Havana<br>transcript //<br>immunoglobulin<br>kappa variable 1D-<br>33[<br>gene_bio                            | --- | ? | ? | 0.487103 | -2.05296 | A<br>down<br>vs B | 1 | 1 | ? | 2.05296 | 2.05296 | B up<br>vs A | 1 | 1 | ? | 0.538413 | 0 | 1 |
| 68903 | TC10002567.hg.1 | m<br>a<br>i<br>n | ---                                                                                                         | ---           | ---                            | ---                                                                                                                                       | ---                                                                                                                     | ---                                                                                                | TCONS_00017955 //<br>NONCODE //<br>accn=NULL<br>class=lncRNA<br>name=Human<br>lincRNA<br>ref=BodyMapLinc                                | --- | ? | ? | 0.484151 | -2.06547 | A<br>down<br>vs B | 1 | 1 | ? | 2.06547 | 2.06547 | B up<br>vs A | 1 | 1 | ? | 0.547549 | 0 | 1 |
| 61799 | TC14002234.hg.1 | m<br>a<br>i<br>n | OTTHUMT000003<br>25960 // IGH3-<br>10 //<br>immunoglobulin<br>heavy diversity 3-<br>10 // 14q32.33 //<br>28 | IGHD3-<br>10  | OTTHU<br>MT0000<br>032596<br>0 | ---                                                                                                                                       | ---                                                                                                                     | ---                                                                                                | OTTHUMT000003259<br>60 // Havana<br>transcript //<br>immunoglobulin<br>heavy diversity 3-<br>10[<br>gene_bio                            | --- | ? | ? | 0.476355 | -2.09927 | A<br>down<br>vs B | 1 | 1 | ? | 2.09927 | 2.09927 | B up<br>vs A | 1 | 1 | ? | 0.572333 | 0 | 1 |
| 355   | TC18000391.hg.1 | m<br>a<br>i<br>n | ---                                                                                                         | ---           | ---                            | ---                                                                                                                                       | ---                                                                                                                     | ---                                                                                                | DQ583164 //<br>NONCODE //<br>accn=DQ583164<br>class=piRNA<br>name=piR-50276<br>ref=NONCODE v2.0<br>transc                               | --- | ? | ? | 0.47556  | -2.10278 | A<br>down<br>vs B | 1 | 1 | ? | 2.10278 | 2.10278 | B up<br>vs A | 1 | 1 | ? | 0.574914 | 0 | 1 |
| 792   | TC14000014.hg.1 | m<br>a<br>i<br>n | ---                                                                                                         | ---           | ---                            | ---                                                                                                                                       | ---                                                                                                                     | ---                                                                                                | DQ591735 //<br>NONCODE //<br>accn=DQ591735<br>class=piRNA<br>name=piR-58847<br>ref=NONCODE v2.0<br>transc                               | --- | ? | ? | 0.47556  | -2.10278 | A<br>down<br>vs B | 1 | 1 | ? | 2.10278 | 2.10278 | B up<br>vs A | 1 | 1 | ? | 0.574913 | 0 | 1 |
| 2219  | TC02000838.hg.1 | m<br>a<br>i<br>n | ---                                                                                                         | ---           | ---                            | ---                                                                                                                                       | ---                                                                                                                     | ---                                                                                                | DQ570062 //<br>NONCODE //<br>accn=DQ570062<br>class=piRNA<br>name=piR-30174<br>ref=NONCODE v2.0<br>transc                               | --- | ? | ? | 0.47556  | -2.10278 | A<br>down<br>vs B | 1 | 1 | ? | 2.10278 | 2.10278 | B up<br>vs A | 1 | 1 | ? | 0.574914 | 0 | 1 |
| 4793  | TC02002302.hg.1 | m<br>a<br>i<br>n | ---                                                                                                         | ---           | ---                            | ---                                                                                                                                       | ---                                                                                                                     | ---                                                                                                | DQ573684 //<br>NONCODE //<br>accn=DQ573684<br>class=piRNA<br>name=piR-41796<br>ref=NONCODE v2.0<br>transc                               | --- | ? | ? | 0.47556  | -2.10278 | A<br>down<br>vs B | 1 | 1 | ? | 2.10278 | 2.10278 | B up<br>vs A | 1 | 1 | ? | 0.574913 | 0 | 1 |
| 7295  | TC18000390.hg.1 | m<br>a<br>i<br>n | ---                                                                                                         | ---           | ---                            | ---                                                                                                                                       | ---                                                                                                                     | ---                                                                                                | DQ573684 //<br>NONCODE //<br>accn=DQ573684<br>class=piRNA<br>name=piR-41796<br>ref=NONCODE v2.0<br>transc                               | --- | ? | ? | 0.47556  | -2.10278 | A<br>down<br>vs B | 1 | 1 | ? | 2.10278 | 2.10278 | B up<br>vs A | 1 | 1 | ? | 0.574913 | 0 | 1 |
| 8440  | TC14000024.hg.1 | m<br>a<br>i<br>n | ---                                                                                                         | ---           | ---                            | ---                                                                                                                                       | ---                                                                                                                     | ---                                                                                                | DQ591735 //<br>NONCODE //<br>accn=DQ591735<br>class=piRNA<br>name=piR-58847<br>ref=NONCODE v2.0<br>transc                               | --- | ? | ? | 0.47556  | -2.10278 | A<br>down<br>vs B | 1 | 1 | ? | 2.10278 | 2.10278 | B up<br>vs A | 1 | 1 | ? | 0.574913 | 0 | 1 |

|       |                 |      |     |     |     |     |     |     |                                                                                                           |     |   |   |         |          |                   |   |   |   |         |         |              |   |   |   |          |   |   |
|-------|-----------------|------|-----|-----|-----|-----|-----|-----|-----------------------------------------------------------------------------------------------------------|-----|---|---|---------|----------|-------------------|---|---|---|---------|---------|--------------|---|---|---|----------|---|---|
| 15302 | TC14000866.hg.1 | main | --- | --- | --- | --- | --- | --- | DQ573684 //<br>NONCODE //<br>accn=DQ573684<br>class=piRNA<br>name=piR-41796<br>ref=NONCODE v2.0<br>transc | --- | ? | ? | 0.47556 | -2.10278 | A<br>down<br>vs B | 1 | 1 | ? | 2.10278 | 2.10278 | B up<br>vs A | 1 | 1 | ? | 0.574913 | 0 | 1 |
| 17549 | TC22000442.hg.1 | main | --- | --- | --- | --- | --- | --- | DQ573684 //<br>NONCODE //<br>accn=DQ573684<br>class=piRNA<br>name=piR-41796<br>ref=NONCODE v2.0<br>transc | --- | ? | ? | 0.47556 | -2.10278 | A<br>down<br>vs B | 1 | 1 | ? | 2.10278 | 2.10278 | B up<br>vs A | 1 | 1 | ? | 0.574913 | 0 | 1 |
| 23099 | TC02000835.hg.1 | main | --- | --- | --- | --- | --- | --- | DQ591735 //<br>NONCODE //<br>accn=DQ591735<br>class=piRNA<br>name=piR-58847<br>ref=NONCODE v2.0<br>transc | --- | ? | ? | 0.47556 | -2.10278 | A<br>down<br>vs B | 1 | 1 | ? | 2.10278 | 2.10278 | B up<br>vs A | 1 | 1 | ? | 0.574913 | 0 | 1 |
| 23282 | TC21000020.hg.1 | main | --- | --- | --- | --- | --- | --- | DQ591735 //<br>NONCODE //<br>accn=DQ591735<br>class=piRNA<br>name=piR-58847<br>ref=NONCODE v2.0<br>transc | --- | ? | ? | 0.47556 | -2.10278 | A<br>down<br>vs B | 1 | 1 | ? | 2.10278 | 2.10278 | B up<br>vs A | 1 | 1 | ? | 0.574913 | 0 | 1 |
| 24527 | TC09001343.hg.1 | main | --- | --- | --- | --- | --- | --- | DQ573684 //<br>NONCODE //<br>accn=DQ573684<br>class=piRNA<br>name=piR-41796<br>ref=NONCODE v2.0<br>transc | --- | ? | ? | 0.47556 | -2.10278 | A<br>down<br>vs B | 1 | 1 | ? | 2.10278 | 2.10278 | B up<br>vs A | 1 | 1 | ? | 0.574914 | 0 | 1 |
| 30626 | TC15001030.hg.1 | main | --- | --- | --- | --- | --- | --- | DQ573684 //<br>NONCODE //<br>accn=DQ573684<br>class=piRNA<br>name=piR-41796<br>ref=NONCODE v2.0<br>transc | --- | ? | ? | 0.47556 | -2.10278 | A<br>down<br>vs B | 1 | 1 | ? | 2.10278 | 2.10278 | B up<br>vs A | 1 | 1 | ? | 0.574913 | 0 | 1 |
| 30627 | TC15001029.hg.1 | main | --- | --- | --- | --- | --- | --- | DQ583164 //<br>NONCODE //<br>accn=DQ583164<br>class=piRNA<br>name=piR-50276<br>ref=NONCODE v2.0<br>transc | --- | ? | ? | 0.47556 | -2.10278 | A<br>down<br>vs B | 1 | 1 | ? | 2.10278 | 2.10278 | B up<br>vs A | 1 | 1 | ? | 0.574914 | 0 | 1 |
| 36194 | TC14000863.hg.1 | main | --- | --- | --- | --- | --- | --- | DQ573684 //<br>NONCODE //<br>accn=DQ573684<br>class=piRNA<br>name=piR-41796<br>ref=NONCODE v2.0<br>transc | --- | ? | ? | 0.47556 | -2.10278 | A<br>down<br>vs B | 1 | 1 | ? | 2.10278 | 2.10278 | B up<br>vs A | 1 | 1 | ? | 0.574913 | 0 | 1 |
| 36314 | TC14000020.hg.1 | main | --- | --- | --- | --- | --- | --- | DQ591735 //<br>NONCODE //<br>accn=DQ591735<br>class=piRNA<br>name=piR-58847<br>ref=NONCODE v2.0<br>transc | --- | ? | ? | 0.47556 | -2.10278 | A<br>down<br>vs B | 1 | 1 | ? | 2.10278 | 2.10278 | B up<br>vs A | 1 | 1 | ? | 0.574913 | 0 | 1 |
| 37049 | TC02000833.hg.1 | main | --- | --- | --- | --- | --- | --- | DQ591735 //<br>NONCODE //<br>accn=DQ591735<br>class=piRNA<br>name=piR-58847<br>ref=NONCODE v2.0<br>transc | --- | ? | ? | 0.47556 | -2.10278 | A<br>down<br>vs B | 1 | 1 | ? | 2.10278 | 2.10278 | B up<br>vs A | 1 | 1 | ? | 0.574913 | 0 | 1 |
| 39201 | TC22000450.hg.1 | main | --- | --- | --- | --- | --- | --- | DQ573684 //<br>NONCODE //<br>accn=DQ573684<br>class=piRNA<br>name=piR-41796<br>ref=NONCODE v2.0<br>transc | --- | ? | ? | 0.47556 | -2.10278 | A<br>down<br>vs B | 1 | 1 | ? | 2.10278 | 2.10278 | B up<br>vs A | 1 | 1 | ? | 0.574913 | 0 | 1 |
| 43312 | TC02000821.hg.1 | main | --- | --- | --- | --- | --- | --- | DQ591735 //<br>NONCODE //<br>accn=DQ591735<br>class=piRNA<br>name=piR-58847<br>ref=NONCODE v2.0<br>transc | --- | ? | ? | 0.47556 | -2.10278 | A<br>down<br>vs B | 1 | 1 | ? | 2.10278 | 2.10278 | B up<br>vs A | 1 | 1 | ? | 0.574913 | 0 | 1 |

|       |                              |                   |                                                                                                            |         |                                |                                                                                                        |                                                                                                                    |                                                                                                 |                                                                                                           |                                                                                  |   |   |          |          |                   |   |   |   |         |         |              |   |   |   |              |   |   |
|-------|------------------------------|-------------------|------------------------------------------------------------------------------------------------------------|---------|--------------------------------|--------------------------------------------------------------------------------------------------------|--------------------------------------------------------------------------------------------------------------------|-------------------------------------------------------------------------------------------------|-----------------------------------------------------------------------------------------------------------|----------------------------------------------------------------------------------|---|---|----------|----------|-------------------|---|---|---|---------|---------|--------------|---|---|---|--------------|---|---|
| 54404 | TC02002305.hg.1              | ma<br>a<br>i<br>n | ---                                                                                                        | ---     | ---                            | ---                                                                                                    | ---                                                                                                                | ---                                                                                             | DQ573684 //<br>NONCODE //<br>accn=DQ573684<br>class=piRNA<br>name=piR-41796<br>ref=NONCODE v2.0<br>transc | ---                                                                              | ? | ? | 0.47556  | -2.10278 | A<br>down<br>vs B | 1 | 1 | ? | 2.10278 | 2.10278 | B up<br>vs A | 1 | 1 | ? | 0.5749<br>13 | 0 | 1 |
| 55114 | TC02002316.hg.1              | ma<br>a<br>i<br>n | ---                                                                                                        | ---     | ---                            | ---                                                                                                    | ---                                                                                                                | ---                                                                                             | DQ573684 //<br>NONCODE //<br>accn=DQ573684<br>class=piRNA<br>name=piR-41796<br>ref=NONCODE v2.0<br>transc | ---                                                                              | ? | ? | 0.47556  | -2.10278 | A<br>down<br>vs B | 1 | 1 | ? | 2.10278 | 2.10278 | B up<br>vs A | 1 | 1 | ? | 0.5749<br>13 | 0 | 1 |
| 57210 | TC14000860.hg.1              | ma<br>a<br>i<br>n | ---                                                                                                        | ---     | ---                            | ---                                                                                                    | ---                                                                                                                | ---                                                                                             | DQ573684 //<br>NONCODE //<br>accn=DQ573684<br>class=piRNA<br>name=piR-41796<br>ref=NONCODE v2.0<br>transc | ---                                                                              | ? | ? | 0.47556  | -2.10278 | A<br>down<br>vs B | 1 | 1 | ? | 2.10278 | 2.10278 | B up<br>vs A | 1 | 1 | ? | 0.5749<br>13 | 0 | 1 |
| 60178 | TCUn_gl00021300<br>0001.hg.1 | ma<br>a<br>i<br>n | ---                                                                                                        | ---     | ---                            | ---                                                                                                    | ---                                                                                                                | ---                                                                                             | DQ583164 //<br>NONCODE //<br>accn=DQ583164<br>class=piRNA<br>name=piR-50276<br>ref=NONCODE v2.0<br>transc | ---                                                                              | ? | ? | 0.47556  | -2.10278 | A<br>down<br>vs B | 1 | 1 | ? | 2.10278 | 2.10278 | B up<br>vs A | 1 | 1 | ? | 0.5749<br>14 | 0 | 1 |
| 62124 | TC02002315.hg.1              | ma<br>a<br>i<br>n | ---                                                                                                        | ---     | ---                            | ---                                                                                                    | ---                                                                                                                | ---                                                                                             | DQ573684 //<br>NONCODE //<br>accn=DQ573684<br>class=piRNA<br>name=piR-41796<br>ref=NONCODE v2.0<br>transc | ---                                                                              | ? | ? | 0.47556  | -2.10278 | A<br>down<br>vs B | 1 | 1 | ? | 2.10278 | 2.10278 | B up<br>vs A | 1 | 1 | ? | 0.5749<br>13 | 0 | 1 |
| 63559 | TC02002337.hg.1              | ma<br>a<br>i<br>n | ---                                                                                                        | ---     | ---                            | ---                                                                                                    | ---                                                                                                                | ---                                                                                             | DQ573684 //<br>NONCODE //<br>accn=DQ573684<br>class=piRNA<br>name=piR-41796<br>ref=NONCODE v2.0<br>transc | ---                                                                              | ? | ? | 0.47556  | -2.10278 | A<br>down<br>vs B | 1 | 1 | ? | 2.10278 | 2.10278 | B up<br>vs A | 1 | 1 | ? | 0.5749<br>13 | 0 | 1 |
| 67205 | TC22000445.hg.1              | ma<br>a<br>i<br>n | ---                                                                                                        | ---     | ---                            | ---                                                                                                    | ---                                                                                                                | ---                                                                                             | DQ573684 //<br>NONCODE //<br>accn=DQ573684<br>class=piRNA<br>name=piR-41796<br>ref=NONCODE v2.0<br>transc | ---                                                                              | ? | ? | 0.47556  | -2.10278 | A<br>down<br>vs B | 1 | 1 | ? | 2.10278 | 2.10278 | B up<br>vs A | 1 | 1 | ? | 0.5749<br>13 | 0 | 1 |
| 29774 | TC19000574.hg.1              | ma<br>a<br>i<br>n | ---                                                                                                        | ---     | ---                            | ---                                                                                                    | ---                                                                                                                | ---                                                                                             | DQ590318 //<br>NONCODE //<br>accn=DQ590318<br>class=piRNA<br>name=piR-57430<br>ref=NONCODE v2.0<br>transc | ---                                                                              | ? | ? | 0.474356 | -2.10812 | A<br>down<br>vs B | 1 | 1 | ? | 2.10812 | 2.10812 | B up<br>vs A | 1 | 1 | ? | 0.5788<br>44 | 0 | 1 |
| 62885 | TC02003402.hg.1              | ma<br>a<br>i<br>n | ---                                                                                                        | ---     | ---                            | ---                                                                                                    | ---                                                                                                                | ---                                                                                             | DQ187489 //<br>NONCODE //<br>accn=DQ187489<br>class=mRNAlite<br>lncRNA name=NULL<br>ref=H-invitational    | ---                                                                              | ? | ? | 0.468983 | -2.13227 | A<br>down<br>vs B | 1 | 1 | ? | 2.13227 | 2.13227 | B up<br>vs A | 1 | 1 | ? | 0.5966<br>59 | 0 | 1 |
| 21865 | TC02000935.hg.1              | ma<br>a<br>i<br>n | ---                                                                                                        | ---     | ---                            | ---                                                                                                    | ---                                                                                                                | ---                                                                                             | uc021vqx.1 // UCSC<br>Genes // Rfam model<br>RF00189 hit found at<br>contig region<br>AC068551.6/16       | ---                                                                              | ? | ? | 0.467626 | -2.13846 | A<br>down<br>vs B | 1 | 1 | ? | 2.13846 | 2.13846 | B up<br>vs A | 1 | 1 | ? | 0.6012<br>36 | 0 | 1 |
| 55959 | TC22001445.hg.1              | ma<br>a<br>i<br>n | OTTHUMT000003<br>21828 // IGLV3-1<br>//<br>immunoglobulin<br>lambda variable<br>3-1 // 22q11.2 //<br>28809 | IGLV3-1 | OTTHU<br>MT0000<br>032182<br>8 | ---                                                                                                    | ---                                                                                                                | ---                                                                                             | OTTHUMT000003218<br>28 // Havana<br>transcript //<br>immunoglobulin<br>lambda variable 3-<br>1 gene_biot  | ---                                                                              | ? | ? | 0.463762 | -2.15628 | A<br>down<br>vs B | 1 | 1 | ? | 2.15628 | 2.15628 | B up<br>vs A | 1 | 1 | ? | 0.6144<br>35 | 0 | 1 |
| 67324 | TC14002211.hg.1              | ma<br>a<br>i<br>n | OTTHUMT000003<br>26459 // IGHA1 //<br>immunoglobulin<br>heavy constant<br>alpha 1 //<br>14q32.33 // 349    | IGHA1   | OTTHU<br>MT0000<br>032645<br>9 | OTTHUM<br>T000003<br>26459 //<br>GO:0001<br>895 //<br>retina<br>homeost<br>asis //<br>inferred<br>from | OTTHUMT00<br>000326459<br>//<br>GO:0005576<br>//<br>extracellular<br>region //<br>traceable<br>author<br>statement | OTTHUMT0<br>0000326459<br>//<br>GO:0003823<br>// antigen<br>binding //<br>not<br>recorded<br>// | OTTHUMT000003264<br>59 // Havana<br>transcript //<br>immunoglobulin<br>heavy constant alpha<br>1 gene_b   | ENST00000<br>390547 //<br>GenMAPP<br>//<br>Inflammat<br>ory_Respons<br>e_Pathway | ? | ? | 0.463286 | -2.1585  | A<br>down<br>vs B | 1 | 1 | ? | 2.1585  | 2.1585  | B up<br>vs A | 1 | 1 | ? | 0.6160<br>79 | 0 | 1 |

|       |                 |      |                                                                                        |       |                                                                                       |                                                                                           |                                                                                          |                                                                                             |     |   |          |          |             |             |   |   |         |         |           |           |   |   |          |          |   |   |
|-------|-----------------|------|----------------------------------------------------------------------------------------|-------|---------------------------------------------------------------------------------------|-------------------------------------------------------------------------------------------|------------------------------------------------------------------------------------------|---------------------------------------------------------------------------------------------|-----|---|----------|----------|-------------|-------------|---|---|---------|---------|-----------|-----------|---|---|----------|----------|---|---|
| 26730 | TC07001299.hg.1 | main | OTTHUMT00000338400 // TRGV4 // T cell receptor gamma variable 4 // 7p14 // 6977        | TRGV4 | OTTHUMT00000338400                                                                    | ---                                                                                       | ---                                                                                      | OTTHUMT00000338400 // Havana transcript // T cell receptor gamma variable 4 // gene_biotype | --- | ? | ?        | 0.459211 | -2.17765    | A down vs B | 1 | 1 | ?       | 2.17765 | 2.17765   | B up vs A | 1 | 1 | ?        | 0.630309 | 0 | 1 |
| 55343 | TC17001281.hg.1 | main | ---                                                                                    | ---   | ---                                                                                   | ---                                                                                       | ---                                                                                      | DQ592978 // NONCODE // accn=DQ592978 class=piRNA name=piR-33090 ref=NONCODE v2.0 trans      | --- | ? | ?        | 0.45741  | -2.18622    | A down vs B | 1 | 1 | ?       | 2.18622 | 2.18622   | B up vs A | 1 | 1 | ?        | 0.636687 | 0 | 1 |
| 25554 | TC16000387.hg.1 | main | ---                                                                                    | ---   | ---                                                                                   | ---                                                                                       | ---                                                                                      | AF209882 // GenBank // Homo sapiens immunoglobulin heavy chain variable region 194-6 mRNA   | --- | ? | ?        | 0.448651 | -2.2289     | A down vs B | 1 | 1 | ?       | 2.2289  | 2.2289    | B up vs A | 1 | 1 | ?        | 0.668554 | 0 | 1 |
| 34861 | TC02003396.hg.1 | main | EF028213 // IGKC // immunoglobulin kappa constant // 2p12 // 3514 // S67637 // IGKC // | IGKC  | EF028213                                                                              | EF028213 // GO:0005576 // extracellular region // not non-traceable author statement // E | EF028213 // GO:0003823 // antigen binding // not recorded // EF028213 // GO:0003823 // E | EF028213 // NONCODE // accn=EF028213 class=mRNAlike lncRNA name=NULL ref=H-invitational     | --- | ? | ?        | 0.445914 | -2.24258    | A down vs B | 1 | 1 | ?       | 2.24258 | 2.24258   | B up vs A | 1 | 1 | ?        | 0.678801 | 0 | 1 |
| 45595 | TC19001436.hg.1 | main | ---                                                                                    | ---   | ---                                                                                   | ---                                                                                       | ---                                                                                      | DQ595116 // NONCODE // accn=DQ595116 class=piRNA name=piR-61228 ref=NONCODE v2.0 trans      | --- | ? | ?        | 0.445132 | -2.24652    | A down vs B | 1 | 1 | ?       | 2.24652 | 2.24652   | B up vs A | 1 | 1 | ?        | 0.681756 | 0 | 1 |
| 16495 | TC11001599.hg.1 | main | ---                                                                                    | ---   | ---                                                                                   | ---                                                                                       | ---                                                                                      | DQ592387 // NONCODE // accn=DQ592387 class=piRNA name=piR-59499 ref=NONCODE v2.0 trans      | --- | ? | ?        | 0.432212 | -2.31368    | A down vs B | 1 | 1 | ?       | 2.31368 | 2.31368   | B up vs A | 1 | 1 | ?        | 0.732278 | 0 | 1 |
| 51244 | TC15000672.hg.1 | main | ---                                                                                    | ---   | ---                                                                                   | ---                                                                                       | ---                                                                                      | DQ587888 // NONCODE // accn=DQ587888 class=piRNA name=piR-55000 ref=NONCODE v2.0 trans      | --- | ? | ?        | 0.42504  | -2.35272    | A down vs B | 1 | 1 | ?       | 2.35272 | 2.35272   | B up vs A | 1 | 1 | ?        | 0.761784 | 0 | 1 |
| 38837 | TC11001628.hg.1 | main | ---                                                                                    | ---   | ---                                                                                   | ---                                                                                       | ---                                                                                      | DQ582305 // NONCODE // accn=DQ582305 class=piRNA name=piR-32417 ref=NONCODE v2.0 trans      | --- | ? | ?        | 0.424402 | -2.35626    | A down vs B | 1 | 1 | ?       | 2.35626 | 2.35626   | B up vs A | 1 | 1 | ?        | 0.764464 | 0 | 1 |
| 48853 | TC02003394.hg.1 | main | ---                                                                                    | ---   | AF103542 // GO:0005576 // extracellular region // non-traceable author statement // A | AF103542 // GO:0003823 // antigen binding // inferred from electronic annotation // A     | AF103542 // NONCODE // accn=AF103542 class=mRNAlike lncRNA name=NULL ref=H-invitational  | ---                                                                                         | ?   | ? | 0.417002 | -2.39807 | A down vs B | 1           | 1 | ? | 2.39807 | 2.39807 | B up vs A | 1         | 1 | ? | 0.796164 | 0        | 1 |   |
| 47704 | TC13000540.hg.1 | main | ---                                                                                    | ---   | ---                                                                                   | ---                                                                                       | ---                                                                                      | DQ590719 // NONCODE // accn=DQ590719 class=piRNA name=piR-57831 ref=NONCODE v2.0 trans      | --- | ? | ?        | 0.402752 | -2.48291    | A down vs B | 1 | 1 | ?       | 2.48291 | 2.48291   | B up vs A | 1 | 1 | ?        | 0.860717 | 0 | 1 |



|       |                 |                  |     |     |     |     |     |     |                                                                                                           |     |   |   |          |          |                   |   |   |   |         |         |              |   |   |   |          |   |   |
|-------|-----------------|------------------|-----|-----|-----|-----|-----|-----|-----------------------------------------------------------------------------------------------------------|-----|---|---|----------|----------|-------------------|---|---|---|---------|---------|--------------|---|---|---|----------|---|---|
| 28454 | TC11001686.hg.1 | m<br>a<br>i<br>n | --- | --- | --- | --- | --- | --- | DQ575274 //<br>NONCODE //<br>accn=DQ575274<br>class=piRNA<br>name=piR-43386<br>ref=NONCODE v2.0<br>transc | --- | ? | ? | 0.400634 | -2.49604 | A<br>down<br>vs B | 1 | 1 | ? | 2.49604 | 2.49604 | B up<br>vs A | 1 | 1 | ? | 0.870729 | 0 | 1 |
| 29152 | TC11001707.hg.1 | m<br>a<br>i<br>n | --- | --- | --- | --- | --- | --- | DQ582888 //<br>NONCODE //<br>accn=DQ582888<br>class=piRNA<br>name=piR-33000<br>ref=NONCODE v2.0<br>transc | --- | ? | ? | 0.393831 | -2.53916 | A<br>down<br>vs B | 1 | 1 | ? | 2.53916 | 2.53916 | B up<br>vs A | 1 | 1 | ? | 0.903638 | 0 | 1 |
| 47897 | TC12000141.hg.1 | m<br>a<br>i<br>n | --- | --- | --- | --- | --- | --- | ENST0000459276 //<br>ENSEMBL // U7 small<br>nuclear RNA<br>[gene_biotype:snRNA<br>transcript_biotype      | --- | ? | ? | 0.388988 | -2.57077 | A<br>down<br>vs B | 1 | 1 | ? | 2.57077 | 2.57077 | B up<br>vs A | 1 | 1 | ? | 0.927797 | 0 | 1 |
| 3123  | TC12002599.hg.1 | m<br>a<br>i<br>n | --- | --- | --- | --- | --- | --- | TCONS_00020585 //<br>NONCODE //<br>accn=NULL<br>class=lncRNA<br>name=Human<br>lincRNA<br>ref=BodyMapLinc  | --- | ? | ? | 0.38017  | -2.6304  | A<br>down<br>vs B | 1 | 1 | ? | 2.6304  | 2.6304  | B up<br>vs A | 1 | 1 | ? | 0.973408 | 0 | 1 |
| 3625  | TC22000444.hg.1 | m<br>a<br>i<br>n | --- | --- | --- | --- | --- | --- | DQ573684 //<br>NONCODE //<br>accn=DQ573684<br>class=piRNA<br>name=piR-41796<br>ref=NONCODE v2.0<br>transc | --- | ? | ? | 0.363742 | -2.7492  | A<br>down<br>vs B | 1 | 1 | ? | 2.7492  | 2.7492  | B up<br>vs A | 1 | 1 | ? | 1.06436  | 0 | 1 |
| 9714  | TC15001033.hg.1 | m<br>a<br>i<br>n | --- | --- | --- | --- | --- | --- | DQ573684 //<br>NONCODE //<br>accn=DQ573684<br>class=piRNA<br>name=piR-41796<br>ref=NONCODE v2.0<br>transc | --- | ? | ? | 0.363742 | -2.7492  | A<br>down<br>vs B | 1 | 1 | ? | 2.7492  | 2.7492  | B up<br>vs A | 1 | 1 | ? | 1.06436  | 0 | 1 |
| 10609 | TC02000859.hg.1 | m<br>a<br>i<br>n | --- | --- | --- | --- | --- | --- | DQ583165 //<br>NONCODE //<br>accn=DQ583165<br>class=piRNA<br>name=piR-50277<br>ref=NONCODE v2.0<br>transc | --- | ? | ? | 0.363742 | -2.7492  | A<br>down<br>vs B | 1 | 1 | ? | 2.7492  | 2.7492  | B up<br>vs A | 1 | 1 | ? | 1.06436  | 0 | 1 |
| 22259 | TC14000865.hg.1 | m<br>a<br>i<br>n | --- | --- | --- | --- | --- | --- | DQ573684 //<br>NONCODE //<br>accn=DQ573684<br>class=piRNA<br>name=piR-41796<br>ref=NONCODE v2.0<br>transc | --- | ? | ? | 0.363742 | -2.7492  | A<br>down<br>vs B | 1 | 1 | ? | 2.7492  | 2.7492  | B up<br>vs A | 1 | 1 | ? | 1.06436  | 0 | 1 |
| 22374 | TC14000022.hg.1 | m<br>a<br>i<br>n | --- | --- | --- | --- | --- | --- | DQ599717 //<br>NONCODE //<br>accn=DQ599717<br>class=piRNA<br>name=piR-37783<br>ref=NONCODE v2.0<br>transc | --- | ? | ? | 0.363742 | -2.7492  | A<br>down<br>vs B | 1 | 1 | ? | 2.7492  | 2.7492  | B up<br>vs A | 1 | 1 | ? | 1.06436  | 0 | 1 |
| 22932 | TC15001019.hg.1 | m<br>a<br>i<br>n | --- | --- | --- | --- | --- | --- | DQ573684 //<br>NONCODE //<br>accn=DQ573684<br>class=piRNA<br>name=piR-41796<br>ref=NONCODE v2.0<br>transc | --- | ? | ? | 0.363742 | -2.7492  | A<br>down<br>vs B | 1 | 1 | ? | 2.7492  | 2.7492  | B up<br>vs A | 1 | 1 | ? | 1.06436  | 0 | 1 |
| 29326 | TC14000021.hg.1 | m<br>a<br>i<br>n | --- | --- | --- | --- | --- | --- | DQ599717 //<br>NONCODE //<br>accn=DQ599717<br>class=piRNA<br>name=piR-37783<br>ref=NONCODE v2.0<br>transc | --- | ? | ? | 0.363742 | -2.7492  | A<br>down<br>vs B | 1 | 1 | ? | 2.7492  | 2.7492  | B up<br>vs A | 1 | 1 | ? | 1.06436  | 0 | 1 |
| 39202 | TC22000449.hg.1 | m<br>a<br>i<br>n | --- | --- | --- | --- | --- | --- | DQ573684 //<br>NONCODE //<br>accn=DQ573684<br>class=piRNA<br>name=piR-41796<br>ref=NONCODE v2.0<br>transc | --- | ? | ? | 0.363742 | -2.7492  | A<br>down<br>vs B | 1 | 1 | ? | 2.7492  | 2.7492  | B up<br>vs A | 1 | 1 | ? | 1.06436  | 0 | 1 |

|       |                 |               |                                                                                                        |      |        |                                                                                                                             |                                                                                                                   |                                                                                                                      |     |                                                                                                           |     |   |   |          |          |                   |   |   |   |         |             |              |   |   |   |             |   |   |
|-------|-----------------|---------------|--------------------------------------------------------------------------------------------------------|------|--------|-----------------------------------------------------------------------------------------------------------------------------|-------------------------------------------------------------------------------------------------------------------|----------------------------------------------------------------------------------------------------------------------|-----|-----------------------------------------------------------------------------------------------------------|-----|---|---|----------|----------|-------------------|---|---|---|---------|-------------|--------------|---|---|---|-------------|---|---|
| 64343 | TC1400015.hg.1  | ma<br>ai<br>n | ---                                                                                                    |      | ---    | ---                                                                                                                         | ---                                                                                                               | ---                                                                                                                  | --- | DQ599717 //<br>NONCODE //<br>accn=DQ599717<br>class=piRNA<br>name=piR-37783<br>ref=NONCODE v2.0<br>transc | --- | ? | ? | 0.363742 | -2.7492  | A<br>down<br>vs B | 1 | 1 | ? | 2.7492  | 2.7492      | B up<br>vs A | 1 | 1 | ? | 1.0643<br>6 | 0 | 1 |
| 65778 | TC02000840.hg.1 | ma<br>ai<br>n | ---                                                                                                    |      | ---    | ---                                                                                                                         | ---                                                                                                               | ---                                                                                                                  | --- | DQ591735 //<br>NONCODE //<br>accn=DQ591735<br>class=piRNA<br>name=piR-58847<br>ref=NONCODE v2.0<br>transc | --- | ? | ? | 0.363742 | -2.7492  | A<br>down<br>vs B | 1 | 1 | ? | 2.7492  | 2.7492      | B up<br>vs A | 1 | 1 | ? | 1.0643<br>6 | 0 | 1 |
| 4979  | TC0Y000160.hg.1 | ma<br>ai<br>n | ---                                                                                                    |      | ---    | ---                                                                                                                         | ---                                                                                                               | ---                                                                                                                  | --- | HM222546 //<br>GenBank // Homo<br>sapiens isolate 1a61<br>immunoglobulin<br>kappa light chain<br>mRNA,    | --- | ? | ? | 0.361722 | -2.76455 | A<br>down<br>vs B | 1 | 1 | ? | 2.76455 | 2.7645<br>5 | B up<br>vs A | 1 | 1 | ? | 1.0761<br>1 | 0 | 1 |
| 22211 | TC02000692.hg.1 | ma<br>ai<br>n | ---                                                                                                    |      | ---    | ---                                                                                                                         | ---                                                                                                               | ---                                                                                                                  | --- | DQ586506 //<br>NONCODE //<br>accn=DQ586506<br>class=piRNA<br>name=piR-53618<br>ref=NONCODE v2.0<br>transc | --- | ? | ? | 0.359038 | -2.78522 | A<br>down<br>vs B | 1 | 1 | ? | 2.78522 | 2.7852<br>2 | B up<br>vs A | 1 | 1 | ? | 1.0919<br>3 | 0 | 1 |
| 1274  | TC04000772.hg.1 | ma<br>ai<br>n | ---                                                                                                    |      | ---    | ---                                                                                                                         | ---                                                                                                               | ---                                                                                                                  | --- | uc021xti.1 // UCSC<br>Genes // Annexin II<br>and uses thereof. //<br>chr4 // 100 // 100 //<br>0 //        | --- | ? | ? | 0.347163 | -2.88049 | A<br>down<br>vs B | 1 | 1 | ? | 2.88049 | 2.8804<br>9 | B up<br>vs A | 1 | 1 | ? | 1.1648<br>2 | 0 | 1 |
| 6629  | TC09000447.hg.1 | ma<br>ai<br>n | ---                                                                                                    |      | ---    | ---                                                                                                                         | ---                                                                                                               | ---                                                                                                                  | --- | DQ594798 //<br>NONCODE //<br>accn=DQ594798<br>class=piRNA<br>name=piR-60910<br>ref=NONCODE v2.0<br>transc | --- | ? | ? | 0.342304 | -2.92138 | A<br>down<br>vs B | 1 | 1 | ? | 2.92138 | 2.9213<br>8 | B up<br>vs A | 1 | 1 | ? | 1.1960<br>7 | 0 | 1 |
| 42928 | TC07002894.hg.1 | ma<br>ai<br>n | Z11232 // TARP //<br>TCR gamma<br>alternate reading<br>frame protein //<br>7p15-p14 //<br>445347 /// Z | TARP | Z11232 | Z11232<br>//<br>GO:0006<br>955 //<br>immune<br>response<br>// non-<br>traceabl<br>e author<br>stateme<br>nt ///<br>Z11232 / | Z11232 //<br>GO:0005887<br>// integral<br>component<br>of plasma<br>membrane<br>// non-<br>traceabl<br>e author s | Z11232 //<br>GO:0004888<br>// transmembr<br>ane<br>signaling<br>receptor<br>activity //<br>non-<br>traceable<br>auth | --- | Z11232 // NONCODE<br>// accn=Z11232<br>class=mRNAlike<br>lncRNA name=NULL<br>ref=H-invitational v7.       | --- | ? | ? | 0.326491 | -3.06287 | A<br>down<br>vs B | 1 | 1 | ? | 3.06287 | 3.0628<br>7 | B up<br>vs A | 1 | 1 | ? | 1.3039<br>3 | 0 | 1 |
| 68648 | TC22000467.hg.1 | ma<br>ai<br>n | ---                                                                                                    |      | ---    | ---                                                                                                                         | ---                                                                                                               | ---                                                                                                                  | --- | HM222546 //<br>GenBank // Homo<br>sapiens isolate 1a61<br>immunoglobulin<br>kappa light chain<br>mRNA,    | --- | ? | ? | 0.322735 | -3.09852 | A<br>down<br>vs B | 1 | 1 | ? | 3.09852 | 3.0985<br>2 | B up<br>vs A | 1 | 1 | ? | 1.3310<br>2 | 0 | 1 |
| 37641 | TC06000499.hg.1 | ma<br>ai<br>n | ---                                                                                                    |      | ---    | ---                                                                                                                         | ---                                                                                                               | ---                                                                                                                  | --- | DQ570403 //<br>NONCODE //<br>accn=DQ570403<br>class=piRNA<br>name=piR-30515<br>ref=NONCODE v2.0<br>transc | --- | ? | ? | 0.303441 | -3.29553 | A<br>down<br>vs B | 1 | 1 | ? | 3.29553 | 3.2955<br>3 | B up<br>vs A | 1 | 1 | ? | 1.4800<br>8 | 0 | 1 |
| 12450 | TC14001399.hg.1 | ma<br>ai<br>n | ---                                                                                                    |      | ---    | ---                                                                                                                         | ---                                                                                                               | ---                                                                                                                  | --- | DQ577137 //<br>NONCODE //<br>accn=DQ577137<br>class=piRNA<br>name=piR-45249<br>ref=NONCODE v2.0<br>transc | --- | ? | ? | 0.285121 | -3.50729 | A<br>down<br>vs B | 1 | 1 | ? | 3.50729 | 3.5072<br>9 | B up<br>vs A | 1 | 1 | ? | 1.6386<br>9 | 0 | 1 |
| 17981 | TC15001907.hg.1 | ma<br>ai<br>n | ---                                                                                                    |      | ---    | ---                                                                                                                         | ---                                                                                                               | ---                                                                                                                  | --- | DQ580631 //<br>NONCODE //<br>accn=DQ580631<br>class=piRNA<br>name=piR-48743<br>ref=NONCODE v2.0<br>transc | --- | ? | ? | 0.21046  | -4.75149 | A<br>down<br>vs B | 1 | 1 | ? | 4.75149 | 4.7514<br>9 | B up<br>vs A | 1 | 1 | ? | 2.5276<br>1 | 0 | 1 |

| Top Canonical Pathways                                       |          |             |
|--------------------------------------------------------------|----------|-------------|
| Name                                                         | p-value  | Overlap     |
| Myo-inositol Biosynthesis                                    | 4.82E-03 | 20.0 % 1/5  |
| Airway Pathology in Chronic Obstructive Pulmonary Disease    | 7.71E-03 | 12.5 % 1/8  |
| B Cell Receptor Signaling                                    | 1.37E-02 | 1.1 % 2/186 |
| D-myo-inositol (1,4,5)-trisphosphate Degradation             | 1.73E-02 | 5.6 % 1/18  |
| 1D-myo-inositol Hexakisphosphate Biosynthesis II (Mammalian) | 1.82E-02 | 5.3 % 1/19  |

| Top Upstream Regulators |                    |                      |
|-------------------------|--------------------|----------------------|
| Upstream Regulator      | p-value of overlap | Predicted Activation |
| PRSS2                   | 1.81E-03           |                      |
| CRTC2                   | 1.17E-02           |                      |
| CEBPE                   | 1.26E-02           |                      |
| ITGB3                   | 1.26E-02           |                      |
| SMARCD3                 | 1.35E-02           |                      |

| Top Diseases and Bio Functions                        |                     |             |
|-------------------------------------------------------|---------------------|-------------|
| Diseases and Disorders                                |                     |             |
| Name                                                  | p-value range       | # Molecules |
| Cardiovascular Disease                                | 3.61E-02 - 3.05E-04 | 3           |
| Hereditary Disorder                                   | 3.61E-02 - 3.05E-04 | 3           |
| Organismal Injury and Abnormalities                   | 4.83E-02 - 3.05E-04 | 16          |
| Skeletal and Muscular Disorders                       | 3.61E-02 - 3.05E-04 | 8           |
| Inflammatory Response                                 | 1.35E-02 - 3.53E-04 | 4           |
| Molecular and Cellular Functions                      |                     |             |
| Name                                                  | p-value range       | # Molecules |
| Cell-To-Cell Signaling and Interaction                | 1.35E-02 - 3.05E-04 | 4           |
| Cell Death and Survival                               | 4.15E-02 - 9.66E-04 | 3           |
| Cell Morphology                                       | 4.17E-02 - 9.66E-04 | 2           |
| Cellular Assembly and Organization                    | 4.17E-02 - 9.66E-04 | 2           |
| Cellular Compromise                                   | 1.35E-02 - 9.66E-04 | 2           |
| Physiological System Development and Function         |                     |             |
| Name                                                  | p-value range       | # Molecules |
| Humoral Immune Response                               | 6.75E-03 - 3.53E-04 | 2           |
| Cardiovascular System Development and Function        | 2.77E-02 - 8.15E-04 | 3           |
| Organ Development                                     | 1.63E-02 - 8.15E-04 | 2           |
| Organ Morphology                                      | 1.92E-02 - 8.15E-04 | 2           |
| Skeletal and Muscular System Development and Function | 1.92E-02 - 8.15E-04 | 2           |

| Top Tox Functions                    |                     |             |
|--------------------------------------|---------------------|-------------|
| Cardiotoxicity                       |                     |             |
| Name                                 | p-value range       | # Molecules |
| Cardiac Arrhythmia                   | 2.77E-02 - 3.05E-04 | 2           |
| Cardiac Dilatation                   | 3.61E-02 - 8.84E-04 | 3           |
| Cardiac Dysfunction                  | 1.92E-02 - 9.66E-04 | 1           |
| Cardiac Enlargement                  | 1.92E-02 - 1.92E-02 | 1           |
| Heart Failure                        | 2.07E-01 - 2.07E-01 | 1           |
| Hepatotoxicity                       |                     |             |
| Name                                 | p-value range       | # Molecules |
| Hepatocellular Carcinoma             | 6.88E-02 - 6.88E-02 | 3           |
| Liver Hyperplasia/Hyperproliferation | 3.38E-01 - 6.88E-02 | 12          |

| Top Networks                                                                                     |       |
|--------------------------------------------------------------------------------------------------|-------|
| ID Associated Network Functions                                                                  | Score |
| 1 Cellular Function and Maintenance, Cell Death and Survival, Gastrointestinal Disease           | 15    |
| 2 Cellular Development, Cellular Growth and Proliferation, Hereditary Disorder                   | 3     |
| 3 Cellular Assembly and Organization, DNA Replication, Recombination, and Repair, Cell Cycle     | 3     |
| 4 Cell-To-Cell Signaling and Interaction, Cellular Compromise, Cellular Function and Maintenance | 3     |
| 5 Ophthalmic Disease, Organismal Injury and Abnormalities, Gastrointestinal Disease              | 2     |

| Top Tox Lists                                                                |          |             |
|------------------------------------------------------------------------------|----------|-------------|
| Name                                                                         | p-value  | Overlap     |
| Reversible Glomerulonephritis Biomarker Panel (Rat)                          | 2.30E-02 | 4.2 % 1/24  |
| Cardiac Hypertrophy                                                          | 4.28E-02 | 0.6 % 2/344 |
| Increases Transmembrane Potential of Mitochondria and Mitochondrial Membrane | 4.73E-02 | 2.0 % 1/50  |
| Hepatic Fibrosis                                                             | 9.59E-02 | 1.0 % 1/104 |
| Liver Proliferation                                                          | 2.00E-01 | 0.4 % 1/230 |

| Top Analysis-Ready Molecules                          |        |       |
|-------------------------------------------------------|--------|-------|
| Expr Fold Change <span style="color: red;">+</span>   |        |       |
| Molecules                                             | Value  | Chart |
| IGHD3-22                                              | +7.645 |       |
| FMOD                                                  | +3.594 |       |
| IGHD3-3                                               | +3.340 |       |
| DMMD*                                                 | +3.296 |       |
| IGKV3D-15                                             | +3.270 |       |
| IGHV3-21                                              | +3.265 |       |
| ABCA6                                                 | +3.232 |       |
| CLNK                                                  | +3.216 |       |
| TCL1A                                                 | +2.429 |       |
| mir-4659                                              | +2.386 |       |
| Expr Fold Change <span style="color: green;">+</span> |        |       |
| Molecules                                             | Value  | Chart |
| TARP*                                                 | +3.063 |       |
| IGKC*                                                 | +2.243 |       |
| TRGV4                                                 | +2.178 |       |
| IGHA1*                                                | +2.159 |       |
| IGLV3-1                                               | +2.156 |       |
| IGHD3-10                                              | +2.099 |       |
| IGKV1D-33                                             | +2.053 |       |
| TRGC2                                                 | +2.005 |       |

**Supplementary figure 1. Significant networks associated with DEGs in twins A vs B identified by IPA.**

Networks were scored based on the number of genes participating in any particular system and some of their associated functions are listed. This picture is generated automatically by IPA software. (ABBREVIATIONS: DEGs = Differentially Expressed Genes; IPA = Ingenuity Pathways Analysis)
